# Supplementary material for: Flux and reflux: metabolite reflux in plant suspension cells and its implications for isotope-assisted metabolic flux analysis
Source: Royal Society of Chemistry journal article supplement (doi:10.1039/c3mb70348g), 2013-12-23
Supplement: c3mb70348g_2.pdf [file c3mb70348g_2.pdf]

# Supplementary Tables

**Table S1. Isotopomer abundances of proteinogenic amino acids from poplar cell suspensions grown under light for 7 d.**

| Fragments (↓)   Labels (→) |         |         |        | 28% U-13C |       |       |     |    | 100% 1-13C |       |       |     |    | 98% U-13C |       |       |     |    |
|----------------------------|---------|---------|--------|-----------|-------|-------|-----|----|------------|-------|-------|-----|----|-----------|-------|-------|-----|----|
| AA                         | frag    | MW-frag | n(m+n) | Rep 1     | Rep 2 | Rep 3 | Avg | SD | Rep 1      | Rep 2 | Rep 3 | Avg | SD | Rep 1     | Rep 2 | Rep 3 | Avg | SD |
| Ala                        | [23]    | 232     | 0      | 66%       | 66%   | 66%   | 66% | 0% | 63%        | 64%   | 63%   | 63% | 0% | ND        | ND    | ND    | ND  | ND |
| Ala                        | [23]    | 232     | 1      | 10%       | 11%   | 10%   | 11% | 0% | 36%        | 35%   | 35%   | 35% | 0% | ND        | ND    | ND    | ND  | ND |
| Ala                        | [23]    | 232     | 2      | 23%       | 23%   | 23%   | 23% | 0% | 1%         | 1%    | 1%    | 1%  | 0% | ND        | ND    | ND    | ND  | ND |
| Ala                        | [123]   | 260     | 0      | 61%       | 60%   | 61%   | 61% | 0% | 61%        | 61%   | 61%   | 61% | 0% | 3%        | 3%    | 4%    | 3%  | 0% |
| Ala                        | [123]   | 260     | 1      | 13%       | 13%   | 13%   | 13% | 0% | 37%        | 36%   | 37%   | 37% | 0% | 2%        | 2%    | 2%    | 2%  | 0% |
| Ala                        | [123]   | 260     | 2      | 8%        | 8%    | 8%    | 8%  | 0% | 3%         | 3%    | 3%    | 3%  | 0% | 2%        | 2%    | 2%    | 2%  | 0% |
| Ala                        | [123]   | 260     | 3      | 19%       | 18%   | 18%   | 18% | 0% | 0%         | 0%    | 0%    | 0%  | 0% | 93%       | 93%   | 93%   | 93% | 0% |
| Asp                        | [12]    | 302     | 0      | 65%       | 66%   | 65%   | 65% | 0% | 73%        | 72%   | 72%   | 72% | 0% | 11%       | 10%   | 11%   | 11% | 0% |
| Asp                        | [12]    | 302     | 1      | 19%       | 19%   | 19%   | 19% | 0% | 25%        | 26%   | 26%   | 26% | 0% | 9%        | 9%    | 9%    | 9%  | 0% |
| Asp                        | [12]    | 302     | 2      | 16%       | 16%   | 16%   | 16% | 0% | 2%         | 2%    | 2%    | 2%  | 0% | 80%       | 81%   | 81%   | 81% | 0% |
| Asp                        | [234]   | 316     | 0      | 54%       | 54%   | 54%   | 54% | 0% | 55%        | 55%   | 55%   | 55% | 0% | 7%        | 7%    | 7%    | 7%  | 0% |
| Asp                        | [234]   | 316     | 1      | 23%       | 24%   | 23%   | 23% | 0% | 37%        | 37%   | 37%   | 37% | 0% | 6%        | 6%    | 6%    | 6%  | 0% |
| Asp                        | [234]   | 316     | 2      | 15%       | 15%   | 15%   | 15% | 0% | 7%         | 7%    | 7%    | 7%  | 0% | 12%       | 12%   | 12%   | 12% | 0% |
| Asp                        | [234]   | 316     | 3      | 7%        | 7%    | 8%    | 7%  | 0% | 1%         | 1%    | 1%    | 1%  | 0% | 75%       | 76%   | 75%   | 75% | 0% |
| Asp                        | [234]   | 390     | 0      | 54%       | 55%   | 55%   | 55% | 0% | 56%        | 56%   | 56%   | 56% | 0% | 7%        | 7%    | 7%    | 7%  | 0% |
| Asp                        | [234]   | 390     | 1      | 23%       | 23%   | 23%   | 23% | 0% | 36%        | 37%   | 37%   | 37% | 0% | 6%        | 5%    | 6%    | 6%  | 0% |
| Asp                        | [234]   | 390     | 2      | 15%       | 15%   | 15%   | 15% | 0% | 7%         | 7%    | 7%    | 7%  | 0% | 12%       | 12%   | 12%   | 12% | 0% |
| Asp                        | [234]   | 390     | 3      | 7%        | 7%    | 7%    | 7%  | 0% | 0%         | 0%    | 0%    | 0%  | 0% | 75%       | 76%   | 75%   | 75% | 0% |
| Asp                        | [1234]  | 418     | 0      | 48%       | 47%   | 47%   | 47% | 0% | 49%        | 48%   | 48%   | 49% | 1% | 6%        | 6%    | 6%    | 6%  | 0% |
| Asp                        | [1234]  | 418     | 1      | 22%       | 22%   | 22%   | 22% | 0% | 39%        | 40%   | 40%   | 39% | 0% | 3%        | 3%    | 3%    | 3%  | 0% |
| Asp                        | [1234]  | 418     | 2      | 17%       | 17%   | 17%   | 17% | 0% | 11%        | 11%   | 11%   | 11% | 0% | 7%        | 7%    | 7%    | 7%  | 0% |
| Asp                        | [1234]  | 418     | 3      | 10%       | 10%   | 11%   | 10% | 0% | 1%         | 1%    | 1%    | 1%  | 0% | 13%       | 12%   | 13%   | 13% | 1% |
| Asp                        | [1234]  | 418     | 4      | 3%        | 3%    | 3%    | 3%  | 0% | 0%         | 0%    | 0%    | 0%  | 0% | 70%       | 72%   | 70%   | 71% | 1% |
| Glu                        | [2345]  | 272     | 0      | 40%       | 40%   | 40%   | 40% | 0% | 39%        | 39%   | 39%   | 39% | 0% | 1%        | 1%    | 1%    | 1%  | 0% |
| Glu                        | [2345]  | 272     | 1      | 23%       | 24%   | 24%   | 24% | 0% | 43%        | 43%   | 43%   | 43% | 0% | 2%        | 1%    | 2%    | 2%  | 0% |
| Glu                        | [2345]  | 272     | 2      | 25%       | 25%   | 25%   | 25% | 0% | 16%        | 16%   | 16%   | 16% | 0% | 5%        | 5%    | 5%    | 5%  | 0% |
| Glu                        | [2345]  | 272     | 3      | 8%        | 8%    | 8%    | 8%  | 0% | 2%         | 2%    | 2%    | 2%  | 0% | 10%       | 10%   | 10%   | 10% | 0% |
| Glu                        | [2345]  | 272     | 4      | 4%        | 4%    | 4%    | 4%  | 0% | 0%         | 0%    | 0%    | 0%  | 0% | 82%       | 82%   | 82%   | 82% | 0% |
| Glu                        | [2345]  | 330     | 0      | 41%       | 41%   | 41%   | 41% | 0% | 40%        | 39%   | 39%   | 39% | 0% | 2%        | 2%    | 2%    | 2%  | 0% |
| Glu                        | [2345]  | 330     | 1      | 23%       | 24%   | 23%   | 23% | 0% | 43%        | 43%   | 43%   | 43% | 0% | 2%        | 1%    | 2%    | 2%  | 0% |
| Glu                        | [2345]  | 330     | 2      | 25%       | 25%   | 25%   | 25% | 0% | 15%        | 16%   | 16%   | 16% | 0% | 6%        | 6%    | 6%    | 6%  | 0% |
| Glu                        | [2345]  | 330     | 3      | 7%        | 7%    | 7%    | 7%  | 0% | 2%         | 2%    | 2%    | 2%  | 0% | 9%        | 9%    | 9%    | 9%  | 0% |
| Glu                        | [2345]  | 330     | 4      | 3%        | 3%    | 3%    | 3%  | 0% | 0%         | 0%    | 0%    | 0%  | 0% | 82%       | 83%   | 82%   | 82% | 0% |
| Glu                        | [12345] | 432     | 0      | 35%       | 35%   | 35%   | 35% | 0% | 35%        | 34%   | 34%   | 34% | 1% | 1%        | 1%    | 1%    | 1%  | 0% |
| Glu                        | [12345] | 432     | 1      | 21%       | 22%   | 22%   | 22% | 0% | 43%        | 43%   | 43%   | 43% | 0% | 1%        | 1%    | 1%    | 1%  | 0% |
| Glu                        | [12345] | 432     | 2      | 25%       | 25%   | 25%   | 25% | 0% | 18%        | 19%   | 19%   | 19% | 0% | 2%        | 2%    | 2%    | 2%  | 0% |
| Glu                        | [12345] | 432     | 3      | 13%       | 13%   | 13%   | 13% | 0% | 3%         | 4%    | 4%    | 4%  | 0% | 6%        | 6%    | 7%    | 6%  | 0% |
| Glu                        | [12345] | 432     | 4      | 5%        | 5%    | 4%    | 5%  | 0% | 0%         | 0%    | 0%    | 0%  | 0% | 11%       | 11%   | 12%   | 11% | 0% |
| Glu                        | [12345] | 432     | 5      | 2%        | 2%    | 2%    | 2%  | 0% | 0%         | 0%    | 0%    | 0%  | 0% | 78%       | 78%   | 77%   | 78% | 1% |
| Gly                        | [2]     | 218     | 0      | 73%       | 73%   | 73%   | 73% | 0% | ND         | ND    | ND    | ND  | ND | 11%       | 11%   | 11%   | 11% | 0% |

# Supplementary Tables

**Table S1. Isotopomer abundances of proteinogenic amino acids from poplar cell suspensions grown under light for 7 d.**

| Fragments (↓)   Labels (→) |             |         |        | 28% U-13C |       |       |     |    |       | 100% 1-13C |       |     |    |       |       | 98% U-13C |     |    |  |  |
|----------------------------|-------------|---------|--------|-----------|-------|-------|-----|----|-------|------------|-------|-----|----|-------|-------|-----------|-----|----|--|--|
| AA                         | frag        | MW-frag | n(m+n) | Rep 1     | Rep 2 | Rep 3 | Avg | SD | Rep 1 | Rep 2      | Rep 3 | Avg | SD | Rep 1 | Rep 2 | Rep 3     | Avg | SD |  |  |
| Gly                        | [2]         | 218     | 1      | 27%       | 27%   | 27%   | 27% | 0% | ND    | ND         | ND    | ND  | ND | 89%   | 89%   | 89%       | 89% | 0% |  |  |
| Gly                        | [12]        | 246     | 0      | 64%       | 63%   | 64%   | 64% | 0% | 92%   | 91%        | 91%   | 91% | 1% | 7%    | 7%    | 7%        | 7%  | 0% |  |  |
| Gly                        | [12]        | 246     | 1      | 18%       | 18%   | 17%   | 18% | 0% | 8%    | 9%         | 9%    | 9%  | 0% | 5%    | 4%    | 5%        | 5%  | 0% |  |  |
| Gly                        | [12]        | 246     | 2      | 18%       | 19%   | 19%   | 19% | 0% | 0%    | 1%         | 1%    | 0%  | 0% | 88%   | 89%   | 88%       | 88% | 0% |  |  |
| His                        | [2345]      | 196     | 0      | 36%       | 36%   | 35%   | 36% | 1% | 58%   | 58%        | 57%   | 58% | 0% | 9%    | 8%    | 8%        | 8%  | 0% |  |  |
| His                        | [2345]      | 196     | 1      | 31%       | 32%   | 32%   | 32% | 1% | 34%   | 34%        | 34%   | 34% | 0% | 1%    | 1%    | 1%        | 1%  | 0% |  |  |
| His                        | [2345]      | 196     | 2      | 20%       | 20%   | 20%   | 20% | 0% | 7%    | 7%         | 7%    | 7%  | 0% | 1%    | 2%    | 2%        | 2%  | 0% |  |  |
| His                        | [2345]      | 196     | 3      | 10%       | 10%   | 10%   | 10% | 0% | 1%    | 1%         | 1%    | 1%  | 0% | 12%   | 13%   | 12%       | 12% | 0% |  |  |
| His                        | [2345]      | 196     | 4      | 2%        | 2%    | 2%    | 2%  | 0% | 0%    | 0%         | 1%    | 1%  | 0% | 77%   | 76%   | 76%       | 76% | 0% |  |  |
| Ile                        | [23456]     | 200     | 0      | 45%       | 45%   | 45%   | 45% | 0% | 45%   | 44%        | 44%   | 44% | 0% | ND    | ND    | ND        | ND  | ND |  |  |
| Ile                        | [23456]     | 200     | 1      | 18%       | 18%   | 18%   | 18% | 0% | 38%   | 38%        | 38%   | 38% | 0% | ND    | ND    | ND        | ND  | ND |  |  |
| Ile                        | [23456]     | 200     | 2      | 22%       | 22%   | 22%   | 22% | 0% | 15%   | 15%        | 15%   | 15% | 0% | ND    | ND    | ND        | ND  | ND |  |  |
| Ile                        | [23456]     | 200     | 3      | 10%       | 10%   | 10%   | 10% | 0% | 2%    | 2%         | 2%    | 2%  | 0% | ND    | ND    | ND        | ND  | ND |  |  |
| Ile                        | [23456]     | 200     | 4      | 3%        | 3%    | 3%    | 3%  | 0% | 0%    | 0%         | 0%    | 0%  | 0% | ND    | ND    | ND        | ND  | ND |  |  |
| Ile                        | [23456]     | 200     | 5      | 2%        | 1%    | 1%    | 2%  | 0% | 0%    | 0%         | 0%    | 0%  | 0% | ND    | ND    | ND        | ND  | ND |  |  |
| Leu                        | [23456]     | 200     | 0      | 40%       | 41%   | 41%   | 41% | 0% | 38%   | 37%        | 37%   | 38% | 0% | 10%   | 9%    | 10%       | 10% | 0% |  |  |
| Leu                        | [23456]     | 200     | 1      | 19%       | 19%   | 19%   | 19% | 0% | 39%   | 39%        | 39%   | 39% | 0% | 3%    | 2%    | 3%        | 3%  | 0% |  |  |
| Leu                        | [23456]     | 200     | 2      | 25%       | 24%   | 24%   | 25% | 0% | 19%   | 19%        | 19%   | 19% | 0% | 2%    | 2%    | 2%        | 2%  | 0% |  |  |
| Leu                        | [23456]     | 200     | 3      | 10%       | 10%   | 10%   | 10% | 0% | 4%    | 4%         | 4%    | 4%  | 0% | 5%    | 5%    | 5%        | 5%  | 0% |  |  |
| Leu                        | [23456]     | 200     | 4      | 5%        | 5%    | 5%    | 5%  | 0% | 0%    | 0%         | 0%    | 0%  | 0% | 15%   | 14%   | 15%       | 14% | 0% |  |  |
| Leu                        | [23456]     | 200     | 5      | 1%        | 1%    | 1%    | 1%  | 0% | 0%    | 0%         | 0%    | 0%  | 0% | 65%   | 67%   | 66%       | 66% | 1% |  |  |
| Leu                        | [23456]     | 274     | 0      | 40%       | 41%   | 41%   | 40% | 0% | 38%   | 37%        | 37%   | 38% | 0% | 10%   | 9%    | 10%       | 10% | 0% |  |  |
| Leu                        | [23456]     | 274     | 1      | 19%       | 19%   | 19%   | 19% | 0% | 39%   | 39%        | 39%   | 39% | 0% | 2%    | 2%    | 2%        | 2%  | 0% |  |  |
| Leu                        | [23456]     | 274     | 2      | 25%       | 24%   | 24%   | 24% | 0% | 19%   | 19%        | 19%   | 19% | 0% | 2%    | 2%    | 2%        | 2%  | 0% |  |  |
| Leu                        | [23456]     | 274     | 3      | 10%       | 10%   | 10%   | 10% | 0% | 4%    | 4%         | 4%    | 4%  | 0% | 5%    | 5%    | 5%        | 5%  | 0% |  |  |
| Leu                        | [23456]     | 274     | 4      | 5%        | 5%    | 5%    | 5%  | 0% | 0%    | 0%         | 0%    | 0%  | 0% | 15%   | 14%   | 15%       | 15% | 0% |  |  |
| Leu                        | [23456]     | 274     | 5      | 1%        | 1%    | 1%    | 1%  | 0% | 0%    | 0%         | 0%    | 0%  | 0% | 66%   | 67%   | 66%       | 66% | 1% |  |  |
| Phe                        | [23456789]  | 234     | 0      | 26%       | 26%   | 26%   | 26% | 0% | 33%   | 33%        | 33%   | 33% | 0% | 6%    | 5%    | 6%        | 6%  | 0% |  |  |
| Phe                        | [23456789]  | 234     | 1      | 14%       | 14%   | 14%   | 14% | 0% | 40%   | 40%        | 41%   | 40% | 0% | 1%    | 0%    | 1%        | 0%  | 0% |  |  |
| Phe                        | [23456789]  | 234     | 2      | 20%       | 20%   | 20%   | 20% | 0% | 21%   | 21%        | 21%   | 21% | 0% | 0%    | 0%    | 0%        | 0%  | 0% |  |  |
| Phe                        | [23456789]  | 234     | 3      | 16%       | 16%   | 16%   | 16% | 0% | 5%    | 5%         | 5%    | 5%  | 0% | 0%    | 0%    | 0%        | 0%  | 0% |  |  |
| Phe                        | [23456789]  | 234     | 4      | 11%       | 11%   | 11%   | 11% | 0% | 1%    | 1%         | 1%    | 1%  | 0% | 0%    | 0%    | 0%        | 0%  | 0% |  |  |
| Phe                        | [23456789]  | 234     | 5      | 8%        | 8%    | 8%    | 8%  | 0% | 0%    | 0%         | 0%    | 0%  | 0% | 1%    | 1%    | 1%        | 1%  | 0% |  |  |
| Phe                        | [23456789]  | 234     | 6      | 4%        | 4%    | 4%    | 4%  | 0% | 0%    | 0%         | 0%    | 0%  | 0% | 3%    | 3%    | 3%        | 3%  | 0% |  |  |
| Phe                        | [23456789]  | 234     | 7      | 1%        | 1%    | 1%    | 1%  | 0% | 0%    | 0%         | 0%    | 0%  | 0% | 9%    | 9%    | 9%        | 9%  | 0% |  |  |
| Phe                        | [23456789]  | 234     | 8      | 1%        | 1%    | 1%    | 1%  | 0% | 0%    | 0%         | 0%    | 0%  | 0% | 80%   | 80%   | 80%       | 80% | 0% |  |  |
| Phe                        | [12]        | 302     | 0      | 68%       | 68%   | 68%   | 68% | 0% | 96%   | 96%        | 96%   | 96% | 0% | 8%    | 8%    | 8%        | 8%  | 0% |  |  |
| Phe                        | [12]        | 302     | 1      | 11%       | 12%   | 12%   | 12% | 0% | 4%    | 4%         | 4%    | 4%  | 0% | 3%    | 3%    | 3%        | 3%  | 0% |  |  |
| Phe                        | [12]        | 302     | 2      | 20%       | 21%   | 21%   | 21% | 0% | 0%    | 0%         | 0%    | 0%  | 0% | 89%   | 89%   | 89%       | 89% | 0% |  |  |
| Phe                        | [123456789] | 336     | 0      | 25%       | 25%   | 25%   | 25% | 0% | 33%   | 32%        | 32%   | 32% | 0% | 6%    | 6%    | 6%        | 6%  | 0% |  |  |

# Supplementary Tables

**Table S1. Isotopomer abundances of proteinogenic amino acids from poplar cell suspensions grown under light for 7 d.**

| AA  | Fragments (↓)   Labels (→) | MW-frag | n(m+n) | 28% U-13C |       |       |     |    | 100% 1-13C |       |       |     |    | 98% U-13C |       |       |     |    |
|-----|----------------------------|---------|--------|-----------|-------|-------|-----|----|------------|-------|-------|-----|----|-----------|-------|-------|-----|----|
|     |                            |         |        | Rep 1     | Rep 2 | Rep 3 | Avg | SD | Rep 1      | Rep 2 | Rep 3 | Avg | SD | Rep 1     | Rep 2 | Rep 3 | Avg | SD |
| Phe | [12345678]                 | 336     | 3      | 14%       | 14%   | 14%   | 14% | 0% | 40%        | 41%   | 41%   | 41% | 0% | 1%        | 1%    | 1%    | 1%  | 0% |
| Phe | [12345678]                 | 336     | 2      | 14%       | 14%   | 14%   | 14% | 0% | 21%        | 22%   | 22%   | 22% | 0% | 0%        | 0%    | 0%    | 0%  | 0% |
| Phe | [12345678]                 | 336     | 3      | 19%       | 19%   | 19%   | 19% | 0% | 5%         | 5%    | 5%    | 5%  | 0% | 0%        | 0%    | 0%    | 0%  | 0% |
| Phe | [12345678]                 | 336     | 4      | 11%       | 11%   | 11%   | 11% | 0% | 1%         | 1%    | 1%    | 1%  | 0% | 0%        | 0%    | 0%    | 0%  | 0% |
| Phe | [12345678]                 | 336     | 5      | 8%        | 8%    | 8%    | 8%  | 0% | 0%         | 0%    | 0%    | 0%  | 0% | 1%        | 0%    | 0%    | 0%  | 0% |
| Phe | [12345678]                 | 336     | 6      | 6%        | 6%    | 6%    | 6%  | 0% | 0%         | 0%    | 0%    | 0%  | 0% | 2%        | 2%    | 2%    | 2%  | 0% |
| Phe | [12345678]                 | 336     | 7      | 2%        | 2%    | 2%    | 2%  | 0% | 0%         | 0%    | 0%    | 0%  | 0% | 3%        | 3%    | 3%    | 3%  | 0% |
| Phe | [12345678]                 | 336     | 8      | 1%        | 1%    | 1%    | 1%  | 0% | 0%         | 0%    | 0%    | 0%  | 0% | 10%       | 10%   | 10%   | 10% | 0% |
| Phe | [12345678]                 | 336     | 9      | 0%        | 0%    | 0%    | 0%  | 0% | 0%         | 0%    | 0%    | 0%  | 0% | 78%       | 78%   | 78%   | 78% | 0% |
| Pro | [2345]                     | 258     | 0      | 48%       | 48%   | 49%   | 48% | 0% | 48%        | 47%   | 47%   | 47% | 0% | 11%       | 10%   | 11%   | 10% | 0% |
| Pro | [2345]                     | 258     | 1      | 22%       | 22%   | 22%   | 22% | 0% | 38%        | 39%   | 38%   | 38% | 0% | 6%        | 6%    | 6%    | 6%  | 0% |
| Pro | [2345]                     | 258     | 2      | 22%       | 22%   | 22%   | 22% | 0% | 13%        | 13%   | 13%   | 13% | 0% | 12%       | 12%   | 12%   | 12% | 0% |
| Pro | [2345]                     | 258     | 3      | 6%        | 6%    | 5%    | 6%  | 0% | 1%         | 1%    | 2%    | 2%  | 0% | 11%       | 11%   | 11%   | 11% | 0% |
| Pro | [2345]                     | 258     | 4      | 3%        | 3%    | 2%    | 3%  | 0% | 0%         | 0%    | 0%    | 0%  | 0% | 60%       | 61%   | 60%   | 60% | 1% |
| Ser | [23]                       | 288     | 0      | 61%       | 61%   | 61%   | 61% | 0% | 75%        | 75%   | 76%   | 76% | 0% | 5%        | 5%    | 5%    | 5%  | 0% |
| Ser | [23]                       | 288     | 1      | 24%       | 24%   | 24%   | 24% | 0% | 24%        | 24%   | 24%   | 24% | 0% | 8%        | 8%    | 8%    | 8%  | 0% |
| Ser | [23]                       | 288     | 2      | 15%       | 15%   | 15%   | 15% | 0% | 0%         | 0%    | 0%    | 0%  | 0% | 87%       | 88%   | 87%   | 87% | 0% |
| Ser | [12]                       | 302     | 0      | 64%       | 65%   | 64%   | 64% | 0% | 95%        |       | 86%   | 90% | 6% | 6%        | 6%    | 6%    | 6%  | 0% |
| Ser | [12]                       | 302     | 1      | 16%       | 15%   | 15%   | 16% | 0% | 5%         |       | 12%   | 8%  | 5% | 8%        | 8%    | 8%    | 8%  | 0% |
| Ser | [12]                       | 302     | 2      | 20%       | 20%   | 20%   | 20% | 0% | 0%         |       | 2%    | 1%  | 1% | 86%       | 86%   | 86%   | 86% | 0% |
| Ser | [23]                       | 362     | 0      | 61%       | 60%   | 61%   | 61% | 0% | 75%        | 75%   | 76%   | 75% | 0% | 5%        | 4%    | 5%    | 5%  | 0% |
| Ser | [23]                       | 362     | 1      | 24%       | 25%   | 24%   | 25% | 0% | 24%        | 24%   | 24%   | 24% | 0% | 8%        | 8%    | 8%    | 8%  | 0% |
| Ser | [23]                       | 362     | 2      | 15%       | 15%   | 15%   | 15% | 0% | 0%         | 0%    | 0%    | 0%  | 0% | 88%       | 88%   | 88%   | 88% | 0% |
| Ser | [123]                      | 390     | 0      | 55%       | 55%   | 56%   | 55% | 0% | 72%        | 72%   | 72%   | 72% | 0% | 4%        | 4%    | 4%    | 4%  | 0% |
| Ser | [123]                      | 390     | 1      | 20%       | 21%   | 20%   | 20% | 0% | 27%        | 27%   | 27%   | 27% | 0% | 3%        | 3%    | 3%    | 3%  | 0% |
| Ser | [123]                      | 390     | 2      | 13%       | 13%   | 13%   | 13% | 0% | 1%         | 1%    | 1%    | 1%  | 0% | 9%        | 8%    | 9%    | 9%  | 0% |
| Ser | [123]                      | 390     | 3      | 12%       | 12%   | 12%   | 12% | 0% | 0%         | 0%    | 0%    | 0%  | 0% | 84%       | 85%   | 84%   | 85% | 0% |
| Thr | [234]                      | 376     | 0      | 57%       | 56%   | 56%   | 56% | 0% | 58%        | 58%   | 58%   | 58% | 0% | 10%       | 9%    | 9%    | 9%  | 0% |
| Thr | [234]                      | 376     | 1      | 21%       | 22%   | 23%   | 22% | 1% | 35%        | 35%   | 35%   | 35% | 0% | 7%        | 7%    | 7%    | 7%  | 0% |
| Thr | [234]                      | 376     | 2      | 15%       | 14%   | 14%   | 14% | 0% | 7%         | 7%    | 7%    | 7%  | 0% | 13%       | 13%   | 13%   | 13% | 0% |
| Thr | [234]                      | 376     | 3      | 7%        | 7%    | 7%    | 7%  | 0% | 0%         | 0%    | 0%    | 0%  | 0% | 70%       | 71%   | 70%   | 70% | 1% |
| Thr | [1234]                     | 404     | 0      | 48%       | 50%   | 49%   | 49% | 1% | 51%        | 51%   | 51%   | 51% | 0% | 8%        | 8%    | 8%    | 8%  | 0% |
| Thr | [1234]                     | 404     | 1      | 22%       | 21%   | 22%   | 21% | 1% | 38%        | 38%   | 38%   | 38% | 0% | 4%        | 4%    | 4%    | 4%  | 0% |
| Thr | [1234]                     | 404     | 2      | 17%       | 16%   | 16%   | 16% | 0% | 10%        | 10%   | 10%   | 10% | 0% | 8%        | 8%    | 8%    | 8%  | 0% |
| Thr | [1234]                     | 404     | 3      | 9%        | 10%   | 10%   | 10% | 0% | 1%         | 1%    | 1%    | 1%  | 0% | 14%       | 14%   | 14%   | 14% | 0% |
| Thr | [1234]                     | 404     | 4      | 3%        | 3%    | 3%    | 3%  | 0% | 0%         | 0%    | 0%    | 0%  | 0% | 65%       | 66%   | 66%   | 66% | 1% |
| Tyr | [12]                       | 302     | 0      | 68%       | 68%   | 69%   | 68% | 0% | 97%        | 97%   | 97%   | 97% | 0% | 10%       | 10%   | 10%   | 10% | 0% |
| Tyr | [12]                       | 302     | 1      | 11%       | 11%   | 11%   | 11% | 0% | 3%         | 3%    | 3%    | 3%  | 0% | 3%        | 3%    | 3%    | 3%  | 0% |
| Tyr | [12]                       | 302     | 2      | 21%       | 21%   | 21%   | 21% | 0% | 0%         | 0%    | 0%    | 0%  | 0% | 87%       | 87%   | 87%   | 87% | 0% |
| Val | [2345]                     | 186     | 0      | 47%       | 48%   | 48%   | 48% | 0% | 45%        | 45%   | 45%   | 45% | 0% | 7%        | 7%    | 7%    | 7%  | 0% |

# Supplementary Tables

**Table S1. Isotopomer abundances of proteinogenic amino acids from poplar cell suspensions grown under light for 7 d.**

|     |         | Fragments (↓)   Labels (→) |        | 28% U-13C |       |       |     |    |       | 100% 1-13C |       |     |    |       | 98% U-13C |       |     |    |  |
|-----|---------|----------------------------|--------|-----------|-------|-------|-----|----|-------|------------|-------|-----|----|-------|-----------|-------|-----|----|--|
| AA  | frag    | MW-frag                    | n(m+n) | Rep 1     | Rep 2 | Rep 3 | Avg | SD | Rep 1 | Rep 2      | Rep 3 | Avg | SD | Rep 1 | Rep 2     | Rep 3 | Avg | SD |  |
| Val | [2345]  | 186                        | 1      | 11%       | 11%   | 11%   | 11% | 0% | 40%   | 40%        | 41%   | 40% | 0% | 1%    | 1%        | 1%    | 1%  | 0% |  |
| Val | [2345]  | 186                        | 2      | 30%       | 30%   | 30%   | 30% | 0% | 12%   | 12%        | 12%   | 12% | 0% | 4%    | 4%        | 4%    | 4%  | 0% |  |
| Val | [2345]  | 186                        | 3      | 6%        | 6%    | 6%    | 6%  | 0% | 2%    | 2%         | 2%    | 2%  | 0% | 9%    | 9%        | 9%    | 9%  | 0% |  |
| Val | [2345]  | 186                        | 4      | 5%        | 5%    | 5%    | 5%  | 0% | 0%    | 0%         | 0%    | 0%  | 0% | 79%   | 80%       | 79%   | 79% | 0% |  |
| Val | [2345]  | 260                        | 0      | 48%       | 48%   | 48%   | 48% | 0% | 46%   | 46%        | 45%   | 46% | 0% | 7%    | 7%        | 7%    | 7%  | 0% |  |
| Val | [2345]  | 260                        | 1      | 12%       | 12%   | 12%   | 12% | 0% | 41%   | 41%        | 42%   | 41% | 0% | 1%    | 1%        | 1%    | 1%  | 0% |  |
| Val | [2345]  | 260                        | 2      | 30%       | 30%   | 30%   | 30% | 0% | 12%   | 12%        | 12%   | 12% | 0% | 4%    | 4%        | 4%    | 4%  | 0% |  |
| Val | [2345]  | 260                        | 3      | 4%        | 4%    | 4%    | 4%  | 0% | 1%    | 1%         | 1%    | 1%  | 0% | 8%    | 8%        | 8%    | 8%  | 0% |  |
| Val | [2345]  | 260                        | 4      | 5%        | 5%    | 5%    | 5%  | 0% | 0%    | 0%         | 0%    | 0%  | 0% | 79%   | 80%       | 79%   | 80% | 0% |  |
| Val | [12345] | 288                        | 0      | 45%       | 46%   | 46%   | 46% | 0% | 45%   | 45%        | 44%   | 45% | 0% | 7%    | 7%        | 7%    | 7%  | 0% |  |
| Val | [12345] | 288                        | 1      | 12%       | 13%   | 13%   | 13% | 0% | 41%   | 41%        | 41%   | 41% | 0% | 1%    | 1%        | 1%    | 1%  | 0% |  |
| Val | [12345] | 288                        | 2      | 19%       | 19%   | 19%   | 19% | 0% | 13%   | 13%        | 13%   | 13% | 0% | 2%    | 2%        | 2%    | 2%  | 0% |  |
| Val | [12345] | 288                        | 3      | 16%       | 15%   | 16%   | 16% | 0% | 1%    | 1%         | 1%    | 1%  | 0% | 4%    | 4%        | 4%    | 4%  | 0% |  |
| Val | [12345] | 288                        | 4      | 3%        | 3%    | 3%    | 3%  | 0% | 0%    | 0%         | 0%    | 0%  | 0% | 8%    | 8%        | 8%    | 8%  | 0% |  |
| Val | [12345] | 288                        | 5      | 5%        | 4%    | 4%    | 4%  | 0% | 0%    | 0%         | 0%    | 0%  | 0% | 78%   | 79%       | 78%   | 78% | 1% |  |
| Val | [12]    | 302                        | 0      | 65%       | 65%   | 65%   | 65% | 0% | 86%   | 86%        | 86%   | 86% | 0% | 11%   | 11%       | 11%   | 11% | 0% |  |
| Val | [12]    | 302                        | 1      | 12%       | 13%   | 12%   | 12% | 0% | 12%   | 12%        | 12%   | 12% | 0% | 4%    | 4%        | 4%    | 4%  | 0% |  |
| Val | [12]    | 302                        | 2      | 23%       | 22%   | 23%   | 23% | 0% | 2%    | 2%         | 2%    | 2%  | 0% | 85%   | 85%       | 85%   | 85% | 0% |  |

# Supplementary Tables

**Table S2. Isotopomer abundances of intracellular metabolites from poplar cell suspensions grown under light and dark for 7 d.**

| Fragments (↓)   Labels (→) |         |         |        | 98% U-13C, under light |       |       |     |    |         |    |       | 98% U-13C, under dark |       |     |    |         |    |  |  |
|----------------------------|---------|---------|--------|------------------------|-------|-------|-----|----|---------|----|-------|-----------------------|-------|-----|----|---------|----|--|--|
| AA                         | frag    | MW-frag | n(m+n) | Rep 1                  | Rep 2 | Rep 3 | Avg | SD | 13C Enr | SD | Rep 1 | Rep 2                 | Rep 3 | Avg | SD | 13C Enr | SD |  |  |
| Ala                        | [23]    | 232     | 0      | 1%                     | 1%    | 1%    | 1%  | 0% | 97%     | 0% | 3%    | 3%                    | 2%    | 2%  | 0% | 95%     | 0% |  |  |
| Ala                        | [23]    | 232     | 1      | 3%                     | 4%    | 3%    | 3%  | 1% | 0%      | 0% | 5%    | 6%                    | 6%    | 6%  | 0% | 0%      | 0% |  |  |
| Ala                        | [23]    | 232     | 2      | 96%                    | 95%   | 96%   | 96% | 1% | 0%      | 0% | 92%   | 92%                   | 92%   | 92% | 0% | 0%      | 0% |  |  |
| Ala                        | [123]   | 260     | 0      | 1%                     | 1%    | 1%    | 1%  | 0% | 97%     | 0% | 2%    | 2%                    | 2%    | 2%  | 0% | 94%     | 0% |  |  |
| Ala                        | [123]   | 260     | 1      | 1%                     | 1%    | 1%    | 1%  | 0% | 0%      | 0% | 2%    | 2%                    | 2%    | 2%  | 0% | 0%      | 0% |  |  |
| Ala                        | [123]   | 260     | 2      | 4%                     | 5%    | 4%    | 4%  | 1% | 0%      | 0% | 7%    | 7%                    | 7%    | 7%  | 0% | 0%      | 0% |  |  |
| Ala                        | [123]   | 260     | 3      | 94%                    | 93%   | 93%   | 93% | 1% | 0%      | 0% | 89%   | 89%                   | 89%   | 89% | 0% | 0%      | 0% |  |  |
| Asp                        | [12]    | 302     | 0      | 5%                     | 5%    | 5%    | 5%  | 0% | 91%     | 0% | 6%    | 6%                    | 5%    | 6%  | 1% | 89%     | 1% |  |  |
| Asp                        | [12]    | 302     | 1      | 7%                     | 8%    | 7%    | 7%  | 0% | 0%      | 0% | 10%   | 9%                    | 10%   | 10% | 1% | 0%      | 0% |  |  |
| Asp                        | [12]    | 302     | 2      | 88%                    | 88%   | 88%   | 88% | 0% | 0%      | 0% | 84%   | 85%                   | 86%   | 85% | 1% | 0%      | 0% |  |  |
| Asp                        | [234]   | 316     | 0      | 2%                     | 2%    | 3%    | 2%  | 0% | 92%     | 1% | 2%    | 2%                    | 0%    | 2%  | 1% | 90%     | 2% |  |  |
| Asp                        | [234]   | 316     | 1      | 3%                     | 3%    | 4%    | 4%  | 0% | 0%      | 0% | 5%    | 7%                    | 5%    | 6%  | 1% | 0%      | 0% |  |  |
| Asp                        | [234]   | 316     | 2      | 8%                     | 10%   | 10%   | 9%  | 1% | 0%      | 0% | 14%   | 12%                   | 11%   | 12% | 1% | 0%      | 0% |  |  |
| Asp                        | [234]   | 316     | 3      | 86%                    | 84%   | 84%   | 85% | 1% | 0%      | 0% | 79%   | 79%                   | 83%   | 80% | 2% | 0%      | 0% |  |  |
| Asp                        | [234]   | 390     | 0      | 2%                     | 2%    | 3%    | 3%  | 0% | 92%     | 0% | 2%    | 0%                    | 2%    | 1%  | 1% | 91%     | 2% |  |  |
| Asp                        | [234]   | 390     | 1      | 3%                     | 3%    | 3%    | 3%  | 0% | 0%      | 0% | 5%    | 3%                    | 4%    | 4%  | 1% | 0%      | 0% |  |  |
| Asp                        | [234]   | 390     | 2      | 9%                     | 10%   | 9%    | 10% | 1% | 0%      | 0% | 13%   | 12%                   | 11%   | 12% | 1% | 0%      | 0% |  |  |
| Asp                        | [234]   | 390     | 3      | 85%                    | 84%   | 85%   | 85% | 0% | 0%      | 0% | 79%   | 85%                   | 84%   | 83% | 3% | 0%      | 0% |  |  |
| Asp                        | [1234]  | 418     | 0      | 2%                     | 2%    | 2%    | 2%  | 0% | 91%     | 0% | 2%    | 1%                    | 1%    | 2%  | 0% | 91%     | 1% |  |  |
| Asp                        | [1234]  | 418     | 1      | 1%                     | 1%    | 2%    | 1%  | 0% | 0%      | 0% | 2%    | 2%                    | 1%    | 2%  | 0% | 0%      | 0% |  |  |
| Asp                        | [1234]  | 418     | 2      | 5%                     | 4%    | 4%    | 5%  | 0% | 0%      | 0% | 5%    | 7%                    | 5%    | 6%  | 1% | 0%      | 0% |  |  |
| Asp                        | [1234]  | 418     | 3      | 12%                    | 12%   | 13%   | 12% | 0% | 0%      | 0% | 14%   | 12%                   | 14%   | 13% | 1% | 0%      | 0% |  |  |
| Asp                        | [1234]  | 418     | 4      | 80%                    | 81%   | 79%   | 80% | 1% | 0%      | 0% | 77%   | 77%                   | 78%   | 78% | 0% | 0%      | 0% |  |  |
| Glu                        | [2345]  | 272     | 0      | 1%                     | 1%    | 1%    | 1%  | 0% | 93%     | 0% | 2%    | 2%                    | 3%    | 2%  | 1% | 86%     | 3% |  |  |
| Glu                        | [2345]  | 272     | 1      | 1%                     | 1%    | 2%    | 1%  | 0% | 0%      | 0% | 2%    | 2%                    | 6%    | 3%  | 2% | 0%      | 0% |  |  |
| Glu                        | [2345]  | 272     | 2      | 5%                     | 5%    | 5%    | 5%  | 0% | 0%      | 0% | 9%    | 10%                   | 11%   | 10% | 1% | 0%      | 0% |  |  |
| Glu                        | [2345]  | 272     | 3      | 9%                     | 10%   | 9%    | 9%  | 1% | 0%      | 0% | 15%   | 17%                   | 15%   | 16% | 1% | 0%      | 0% |  |  |
| Glu                        | [2345]  | 272     | 4      | 84%                    | 83%   | 83%   | 83% | 1% | 0%      | 0% | 72%   | 68%                   | 65%   | 69% | 4% | 0%      | 0% |  |  |
| Glu                        | [2345]  | 330     | 0      | 1%                     | 1%    | 1%    | 1%  | 0% | 93%     | 0% | 3%    | 3%                    | 0%    | 2%  | 2% | 86%     | 2% |  |  |
| Glu                        | [2345]  | 330     | 1      | 1%                     | 1%    | 2%    | 1%  | 0% | 0%      | 0% | 2%    | 2%                    | 6%    | 3%  | 2% | 0%      | 0% |  |  |
| Glu                        | [2345]  | 330     | 2      | 6%                     | 5%    | 6%    | 6%  | 0% | 0%      | 0% | 10%   | 15%                   | 15%   | 13% | 3% | 0%      | 0% |  |  |
| Glu                        | [2345]  | 330     | 3      | 9%                     | 10%   | 9%    | 9%  | 0% | 0%      | 0% | 13%   | 13%                   | 15%   | 13% | 1% | 0%      | 0% |  |  |
| Glu                        | [2345]  | 330     | 4      | 83%                    | 82%   | 82%   | 83% | 1% | 0%      | 0% | 73%   | 68%                   | 64%   | 68% | 4% | 0%      | 0% |  |  |
| Glu                        | [12345] | 432     | 0      | 1%                     | 1%    | 1%    | 1%  | 0% | 93%     | 0% | 1%    | 0%                    | 3%    | 1%  | 1% | 88%     | 3% |  |  |
| Glu                        | [12345] | 432     | 1      | 1%                     | 1%    | 1%    | 1%  | 0% | 0%      | 0% | 2%    | 1%                    | 2%    | 2%  | 1% | 0%      | 0% |  |  |
| Glu                        | [12345] | 432     | 2      | 2%                     | 2%    | 2%    | 2%  | 0% | 0%      | 0% | 4%    | 2%                    | 5%    | 3%  | 1% | 0%      | 0% |  |  |
| Glu                        | [12345] | 432     | 3      | 6%                     | 6%    | 6%    | 6%  | 0% | 0%      | 0% | 9%    | 11%                   | 12%   | 11% | 2% | 0%      | 0% |  |  |
| Glu                        | [12345] | 432     | 4      | 11%                    | 12%   | 11%   | 11% | 0% | 0%      | 0% | 15%   | 17%                   | 15%   | 16% | 1% | 0%      | 0% |  |  |
| Glu                        | [12345] | 432     | 5      | 80%                    | 79%   | 79%   | 79% | 1% | 0%      | 0% | 70%   | 69%                   | 63%   | 67% | 4% | 0%      | 0% |  |  |
| Gly                        | [2]     | 218     | 0      | 7%                     | 8%    | 8%    | 8%  | 0% | 92%     | 0% | 8%    | 7%                    | 7%    | 7%  | 0% | 93%     | 0% |  |  |

# Supplementary Tables

**Table S2. Isotopomer abundances of intracellular metabolites from poplar cell suspensions grown under light and dark for 7 d.**

| Fragments (↓)   Labels (→) |          |         |        | 98% U-13C, under light |       |       |     |    |         |    |       | 98% U-13C, under dark |       |     |    |         |    |  |  |
|----------------------------|----------|---------|--------|------------------------|-------|-------|-----|----|---------|----|-------|-----------------------|-------|-----|----|---------|----|--|--|
| AA                         | frag     | MW-frag | n(m+n) | Rep 1                  | Rep 2 | Rep 3 | Avg | SD | 13C Enr | SD | Rep 1 | Rep 2                 | Rep 3 | Avg | SD | 13C Enr | SD |  |  |
| Gly                        | [2]      | 218     | 1      | 93%                    | 92%   | 92%   | 92% | 0% | 0%      | 0% | 92%   | 93%                   | 93%   | 93% | 0% | 0%      | 0% |  |  |
| Gly                        | [12]     | 246     | 0      | 6%                     | 5%    | 6%    | 6%  | 0% | 91%     | 0% | 6%    | 5%                    | 5%    | 5%  | 0% | 91%     | 1% |  |  |
| Gly                        | [12]     | 246     | 1      | 6%                     | 7%    | 6%    | 6%  | 0% | 0%      | 0% | 7%    | 7%                    | 7%    | 7%  | 0% | 0%      | 0% |  |  |
| Gly                        | [12]     | 246     | 2      | 88%                    | 88%   | 88%   | 88% | 0% | 0%      | 0% | 87%   | 88%                   | 88%   | 88% | 1% | 0%      | 0% |  |  |
| His                        | [2345]   | 196     | 0      | 7%                     | 7%    | 8%    | 8%  | 1% | 88%     | 1% | 6%    | 6%                    | 7%    | 6%  | 0% | 89%     | 1% |  |  |
| His                        | [2345]   | 196     | 1      | 1%                     | 1%    | 1%    | 1%  | 0% | 0%      | 0% | 1%    | 1%                    | 1%    | 1%  | 0% | 0%      | 0% |  |  |
| His                        | [2345]   | 196     | 2      | 2%                     | 2%    | 2%    | 2%  | 0% | 0%      | 0% | 3%    | 2%                    | 2%    | 2%  | 0% | 0%      | 0% |  |  |
| His                        | [2345]   | 196     | 3      | 11%                    | 13%   | 11%   | 11% | 1% | 0%      | 0% | 13%   | 13%                   | 13%   | 13% | 0% | 0%      | 0% |  |  |
| His                        | [2345]   | 196     | 4      | 79%                    | 77%   | 78%   | 78% | 1% | 0%      | 0% | 77%   | 78%                   | 77%   | 77% | 1% | 0%      | 0% |  |  |
| His                        | [23456]  | 338     | 0      | 8%                     | 8%    | 9%    | 8%  | 1% | 88%     | 1% | 6%    | 7%                    | 7%    | 7%  | 0% | 89%     | 1% |  |  |
| His                        | [23456]  | 338     | 1      | 1%                     | 1%    | 1%    | 1%  | 0% | 0%      | 0% | -1%   | 1%                    | 1%    | 0%  | 1% | 0%      | 0% |  |  |
| His                        | [23456]  | 338     | 2      | 1%                     | 1%    | 1%    | 1%  | 0% | 0%      | 0% | 1%    | 1%                    | 0%    | 0%  | 1% | 0%      | 0% |  |  |
| His                        | [23456]  | 338     | 3      | 2%                     | 3%    | 3%    | 3%  | 0% | 0%      | 0% | 2%    | 4%                    | 5%    | 4%  | 2% | 0%      | 0% |  |  |
| His                        | [23456]  | 338     | 4      | 10%                    | 11%   | 9%    | 10% | 1% | 0%      | 0% | 12%   | 10%                   | 11%   | 11% | 1% | 0%      | 0% |  |  |
| His                        | [23456]  | 338     | 5      | 78%                    | 77%   | 77%   | 78% | 0% | 0%      | 0% | 80%   | 78%                   | 77%   | 78% | 1% | 0%      | 0% |  |  |
| His                        | [123456] | 440     | 0      | 7%                     | 7%    | 8%    | 8%  | 1% | 88%     | 1% | 6%    | 7%                    | 6%    | 6%  | 1% | 90%     | 0% |  |  |
| His                        | [123456] | 440     | 1      | 1%                     | 1%    | 1%    | 1%  | 0% | 0%      | 0% | 1%    | 0%                    | 0%    | 0%  | 0% | 0%      | 0% |  |  |
| His                        | [123456] | 440     | 2      | 0%                     | 0%    | 1%    | 0%  | 0% | 0%      | 0% | 0%    | 0%                    | 0%    | 0%  | 0% | 0%      | 0% |  |  |
| His                        | [123456] | 440     | 3      | 1%                     | 1%    | 1%    | 1%  | 0% | 0%      | 0% | 1%    | 1%                    | 1%    | 1%  | 0% | 0%      | 0% |  |  |
| His                        | [123456] | 440     | 4      | 2%                     | 2%    | 2%    | 2%  | 0% | 0%      | 0% | 2%    | 1%                    | 2%    | 2%  | 1% | 0%      | 0% |  |  |
| His                        | [123456] | 440     | 5      | 11%                    | 11%   | 11%   | 11% | 0% | 0%      | 0% | 11%   | 12%                   | 11%   | 12% | 0% | 0%      | 0% |  |  |
| His                        | [123456] | 440     | 6      | 78%                    | 78%   | 77%   | 77% | 0% | 0%      | 0% | 79%   | 78%                   | 79%   | 79% | 1% | 0%      | 0% |  |  |
| Ile                        | [23456]  | 200     | 0      | 9%                     | 8%    | 9%    | 9%  | 0% | 78%     | 1% | 8%    | 8%                    | 7%    | 7%  | 0% | 78%     | 1% |  |  |
| Ile                        | [23456]  | 200     | 1      | 2%                     | 2%    | 2%    | 2%  | 0% | 0%      | 0% | 1%    | 1%                    | 1%    | 1%  | 0% | 0%      | 0% |  |  |
| Ile                        | [23456]  | 200     | 2      | 8%                     | 8%    | 9%    | 9%  | 0% | 0%      | 0% | 8%    | 8%                    | 9%    | 8%  | 1% | 0%      | 0% |  |  |
| Ile                        | [23456]  | 200     | 3      | 9%                     | 9%    | 10%   | 10% | 0% | 0%      | 0% | 11%   | 11%                   | 12%   | 12% | 1% | 0%      | 0% |  |  |
| Ile                        | [23456]  | 200     | 4      | 14%                    | 15%   | 14%   | 14% | 1% | 0%      | 0% | 17%   | 18%                   | 19%   | 18% | 1% | 0%      | 0% |  |  |
| Ile                        | [23456]  | 200     | 5      | 58%                    | 57%   | 56%   | 57% | 1% | 0%      | 0% | 54%   | 55%                   | 51%   | 53% | 2% | 0%      | 0% |  |  |
| Ile                        | [23456]  | 274     | 0      | 8%                     | 8%    | 9%    | 8%  | 0% | 79%     | 1% | 8%    | 7%                    | 7%    | 7%  | 0% | 78%     | 1% |  |  |
| Ile                        | [23456]  | 274     | 1      | 2%                     | 2%    | 2%    | 2%  | 0% | 0%      | 0% | 1%    | 1%                    | 2%    | 1%  | 0% | 0%      | 0% |  |  |
| Ile                        | [23456]  | 274     | 2      | 8%                     | 8%    | 9%    | 8%  | 0% | 0%      | 0% | 8%    | 8%                    | 9%    | 8%  | 0% | 0%      | 0% |  |  |
| Ile                        | [23456]  | 274     | 3      | 9%                     | 9%    | 10%   | 9%  | 0% | 0%      | 0% | 11%   | 11%                   | 12%   | 11% | 1% | 0%      | 0% |  |  |
| Ile                        | [23456]  | 274     | 4      | 14%                    | 15%   | 14%   | 14% | 1% | 0%      | 0% | 17%   | 17%                   | 19%   | 18% | 1% | 0%      | 0% |  |  |
| Ile                        | [23456]  | 274     | 5      | 59%                    | 58%   | 57%   | 58% | 1% | 0%      | 0% | 54%   | 55%                   | 52%   | 54% | 2% | 0%      | 0% |  |  |
| Ile                        | [12]     | 302     | 0      | 27%                    | 27%   | 27%   | 27% | 0% | 68%     | 1% | 27%   | 27%                   | 27%   | 27% | 0% | 68%     | 0% |  |  |
| Ile                        | [12]     | 302     | 1      | 10%                    | 10%   | 10%   | 10% | 0% | 0%      | 0% | 10%   | 10%                   | 11%   | 11% | 1% | 0%      | 0% |  |  |
| Ile                        | [12]     | 302     | 2      | 64%                    | 63%   | 63%   | 63% | 1% | 0%      | 0% | 63%   | 63%                   | 62%   | 63% | 1% | 0%      | 0% |  |  |
| Leu                        | [23456]  | 200     | 0      | 7%                     | 7%    | 7%    | 7%  | 0% | 86%     | 0% | 6%    | 6%                    | 6%    | 6%  | 0% | 85%     | 1% |  |  |
| Leu                        | [23456]  | 200     | 1      | 2%                     | 2%    | 2%    | 2%  | 0% | 0%      | 0% | 1%    | 1%                    | 1%    | 1%  | 0% | 0%      | 0% |  |  |
| Leu                        | [23456]  | 200     | 2      | 2%                     | 2%    | 2%    | 2%  | 0% | 0%      | 0% | 2%    | 2%                    | 2%    | 2%  | 0% | 0%      | 0% |  |  |



# Supplementary Tables

**Table S2. Isotopomer abundances of intracellular metabolites from poplar cell suspensions grown under light and dark for 7 d.**

| Fragments (↓)   Labels (→) |          |         |        | 98% U-13C, under light |       |       |     |     |         |    | 98% U-13C, under dark |       |       |     |     |         |    |
|----------------------------|----------|---------|--------|------------------------|-------|-------|-----|-----|---------|----|-----------------------|-------|-------|-----|-----|---------|----|
| AA                         | frag     | MW-frag | n(m+n) | Rep 1                  | Rep 2 | Rep 3 | Avg | SD  | 13C Enr | SD | Rep 1                 | Rep 2 | Rep 3 | Avg | SD  | 13C Enr | SD |
| Leu                        | [23456]  | 200     | 3      | 4%                     | 5%    | 4%    | 4%  | 0%  | 0%      | 0% | 5%                    | 5%    | 6%    | 5%  | 0%  | 0%      | 0% |
| Leu                        | [23456]  | 200     | 4      | 12%                    | 14%   | 12%   | 13% | 1%  | 0%      | 0% | 21%                   | 21%   | 24%   | 22% | 2%  | 0%      | 0% |
| Leu                        | [23456]  | 200     | 5      | 73%                    | 71%   | 71%   | 72% | 1%  | 0%      | 0% | 64%                   | 64%   | 60%   | 63% | 2%  | 0%      | 0% |
| Leu                        | [23456]  | 274     | 0      | 7%                     | 7%    | 7%    | 7%  | 0%  | 86%     | 0% | 6%                    | 6%    | 6%    | 6%  | 0%  | 85%     | 1% |
| Leu                        | [23456]  | 274     | 1      | 2%                     | 2%    | 2%    | 2%  | 0%  | 0%      | 0% | 1%                    | 1%    | 1%    | 1%  | 0%  | 0%      | 0% |
| Leu                        | [23456]  | 274     | 2      | 2%                     | 2%    | 2%    | 2%  | 0%  | 0%      | 0% | 2%                    | 2%    | 2%    | 2%  | 0%  | 0%      | 0% |
| Leu                        | [23456]  | 274     | 3      | 4%                     | 4%    | 4%    | 4%  | 0%  | 0%      | 0% | 5%                    | 5%    | 5%    | 5%  | 0%  | 0%      | 0% |
| Leu                        | [23456]  | 274     | 4      | 12%                    | 14%   | 13%   | 13% | 1%  | 0%      | 0% | 21%                   | 21%   | 24%   | 22% | 2%  | 0%      | 0% |
| Leu                        | [23456]  | 274     | 5      | 73%                    | 71%   | 72%   | 72% | 1%  | 0%      | 0% | 65%                   | 65%   | 61%   | 63% | 2%  | 0%      | 0% |
| Lys                        | [23456]  | 329     | 0      | 7%                     | 13%   | 10%   | 10% | 3%  | 77%     | 0% | 9%                    | 4%    | 14%   | 9%  | 5%  | 77%     | 3% |
| Lys                        | [23456]  | 329     | 1      | 5%                     | 3%    | 4%    | 4%  | 1%  | 0%      | 0% | 3%                    | 7%    | 0%    | 3%  | 4%  | 0%      | 0% |
| Lys                        | [23456]  | 329     | 2      | 7%                     | 7%    | 2%    | 6%  | 3%  | 0%      | 0% | 4%                    | 5%    | 6%    | 5%  | 1%  | 0%      | 0% |
| Lys                        | [23456]  | 329     | 3      | 11%                    | 13%   | 14%   | 13% | 1%  | 0%      | 0% | 18%                   | 9%    | 12%   | 13% | 5%  | 0%      | 0% |
| Lys                        | [23456]  | 329     | 4      | 14%                    | 16%   | 16%   | 15% | 1%  | 0%      | 0% | 12%                   | 16%   | 16%   | 15% | 2%  | 0%      | 0% |
| Lys                        | [23456]  | 329     | 5      | 56%                    | 47%   | 55%   | 53% | 5%  | 0%      | 0% | 54%                   | 59%   | 52%   | 55% | 3%  | 0%      | 0% |
| Lys                        | [123456] | 431     | 0      | 7%                     | 13%   | 11%   | 10% | 3%  | 78%     | 2% | 6%                    | 6%    | 7%    | 6%  | 0%  | 76%     | 2% |
| Lys                        | [123456] | 431     | 1      | 2%                     | 2%    | 0%    | 1%  | 2%  | 0%      | 0% | 2%                    | 3%    | 0%    | 2%  | 1%  | 0%      | 0% |
| Lys                        | [123456] | 431     | 2      | 2%                     | 2%    | 3%    | 2%  | 0%  | 0%      | 0% | 1%                    | 3%    | 1%    | 1%  | 1%  | 0%      | 0% |
| Lys                        | [123456] | 431     | 3      | 5%                     | 6%    | 5%    | 6%  | 1%  | 0%      | 0% | 4%                    | 4%    | 7%    | 5%  | 2%  | 0%      | 0% |
| Lys                        | [123456] | 431     | 4      | 14%                    | 33%   | 18%   | 21% | 10% | 0%      | 0% | 28%                   | 31%   | 37%   | 32% | 5%  | 0%      | 0% |
| Lys                        | [123456] | 431     | 5      | 18%                    | 9%    | 12%   | 13% | 5%  | 0%      | 0% | 13%                   | 8%    | 15%   | 12% | 4%  | 0%      | 0% |
| Lys                        | [123456] | 431     | 6      | 52%                    | 34%   | 51%   | 46% | 10% | 0%      | 0% | 47%                   | 45%   | 33%   | 42% | 7%  | 0%      | 0% |
| Lys                        | [123456] | 488     | 0      | 7%                     | 10%   | 8%    | 9%  | 2%  | 81%     | 3% | 9%                    | 1%    | 9%    | 6%  | 5%  | 81%     | 4% |
| Lys                        | [123456] | 488     | 1      | 1%                     | 1%    | 0%    | 1%  | 1%  | 0%      | 0% | 1%                    | 6%    | 2%    | 3%  | 3%  | 0%      | 0% |
| Lys                        | [123456] | 488     | 2      | 4%                     | -1%   | 2%    | 2%  | 3%  | 0%      | 0% | 0%                    | 9%    | 2%    | 3%  | 4%  | 0%      | 0% |
| Lys                        | [123456] | 488     | 3      | 6%                     | 7%    | 5%    | 6%  | 1%  | 0%      | 0% | 6%                    | 1%    | 10%   | 6%  | 5%  | 0%      | 0% |
| Lys                        | [123456] | 488     | 4      | 11%                    | 11%   | 7%    | 9%  | 3%  | 0%      | 0% | 11%                   | 5%    | 8%    | 8%  | 3%  | 0%      | 0% |
| Lys                        | [123456] | 488     | 5      | 7%                     | 18%   | 11%   | 12% | 6%  | 0%      | 0% | 13%                   | 5%    | 21%   | 13% | 8%  | 0%      | 0% |
| Lys                        | [123456] | 488     | 6      | 65%                    | 53%   | 67%   | 61% | 8%  | 0%      | 0% | 60%                   | 74%   | 48%   | 61% | 13% | 0%      | 0% |
| Met                        | [2345]   | 218     | 0      | 2%                     | 2%    | 2%    | 2%  | 0%  | 88%     | 0% | 3%                    | 3%    | 3%    | 3%  | 0%  | 84%     | 1% |
| Met                        | [2345]   | 218     | 1      | 6%                     | 6%    | 6%    | 6%  | 0%  | 0%      | 0% | 7%                    | 7%    | 8%    | 7%  | 1%  | 0%      | 0% |
| Met                        | [2345]   | 218     | 2      | 4%                     | 5%    | 4%    | 4%  | 0%  | 0%      | 0% | 6%                    | 7%    | 8%    | 7%  | 1%  | 0%      | 0% |
| Met                        | [2345]   | 218     | 3      | 13%                    | 14%   | 13%   | 13% | 1%  | 0%      | 0% | 15%                   | 15%   | 16%   | 15% | 1%  | 0%      | 0% |
| Met                        | [2345]   | 218     | 4      | 75%                    | 73%   | 75%   | 74% | 1%  | 0%      | 0% | 69%                   | 68%   | 66%   | 68% | 2%  | 0%      | 0% |
| Met                        | [2345]   | 292     | 0      | 1%                     | 2%    | 2%    | 2%  | 0%  | 89%     | 0% | 1%                    | 2%    | 1%    | 2%  | 0%  | 87%     | 1% |
| Met                        | [2345]   | 292     | 1      | 5%                     | 5%    | 5%    | 5%  | 0%  | 0%      | 0% | 6%                    | 5%    | 7%    | 6%  | 1%  | 0%      | 0% |
| Met                        | [2345]   | 292     | 2      | 4%                     | 4%    | 4%    | 4%  | 0%  | 0%      | 0% | 6%                    | 6%    | 8%    | 6%  | 1%  | 0%      | 0% |
| Met                        | [2345]   | 292     | 3      | 14%                    | 15%   | 14%   | 14% | 1%  | 0%      | 0% | 15%                   | 15%   | 16%   | 15% | 1%  | 0%      | 0% |
| Met                        | [2345]   | 292     | 4      | 75%                    | 75%   | 75%   | 75% | 0%  | 0%      | 0% | 73%                   | 73%   | 68%   | 71% | 3%  | 0%      | 0% |
| Met                        | [12345]  | 320     | 0      | 1%                     | 2%    | 1%    | 1%  | 1%  | 89%     | 0% | 1%                    | 2%    | 2%    | 1%  | 0%  | 88%     | 2% |

# Supplementary Tables

**Table S2. Isotopomer abundances of intracellular metabolites from poplar cell suspensions grown under light and dark for 7 d.**

| Fragments (↓)   Labels (→) |             |         |        | 98% U-13C, under light |       |       |     |    |         |    | 98% U-13C, under dark |       |       |     |    |         |    |
|----------------------------|-------------|---------|--------|------------------------|-------|-------|-----|----|---------|----|-----------------------|-------|-------|-----|----|---------|----|
| AA                         | frag        | MW-frag | n(m+n) | Rep 1                  | Rep 2 | Rep 3 | Avg | SD | 13C Enr | SD | Rep 1                 | Rep 2 | Rep 3 | Avg | SD | 13C Enr | SD |
| Met                        | [12345]     | 320     | 1      | 5%                     | 4%    | 5%    | 4%  | 0% | 0%      | 0% | 4%                    | 2%    | 5%    | 4%  | 1% | 0%      | 0% |
| Met                        | [12345]     | 320     | 2      | 2%                     | 2%    | 3%    | 2%  | 0% | 0%      | 0% | 2%                    | 3%    | 5%    | 3%  | 2% | 0%      | 0% |
| Met                        | [12345]     | 320     | 3      | 4%                     | 5%    | 4%    | 5%  | 0% | 0%      | 0% | 5%                    | 7%    | 8%    | 7%  | 2% | 0%      | 0% |
| Met                        | [12345]     | 320     | 4      | 14%                    | 16%   | 14%   | 14% | 1% | 0%      | 0% | 17%                   | 17%   | 16%   | 17% | 0% | 0%      | 0% |
| Met                        | [12345]     | 320     | 5      | 74%                    | 72%   | 74%   | 73% | 1% | 0%      | 0% | 72%                   | 70%   | 64%   | 68% | 4% | 0%      | 0% |
| Phe                        | [23456789]  | 234     | 0      | 3%                     | 4%    | 4%    | 4%  | 0% | 94%     | 0% | 2%                    | 2%    | 2%    | 2%  | 0% | 95%     | 0% |
| Phe                        | [23456789]  | 234     | 1      | 0%                     | 0%    | 0%    | 0%  | 0% | 0%      | 0% | 0%                    | 0%    | 0%    | 0%  | 0% | 0%      | 0% |
| Phe                        | [23456789]  | 234     | 2      | 0%                     | 0%    | 0%    | 0%  | 0% | 0%      | 0% | 0%                    | 0%    | 0%    | 0%  | 0% | 0%      | 0% |
| Phe                        | [23456789]  | 234     | 3      | 0%                     | 0%    | 0%    | 0%  | 0% | 0%      | 0% | 0%                    | 0%    | 0%    | 0%  | 0% | 0%      | 0% |
| Phe                        | [23456789]  | 234     | 4      | 0%                     | 0%    | 0%    | 0%  | 0% | 0%      | 0% | 0%                    | 0%    | 0%    | 0%  | 0% | 0%      | 0% |
| Phe                        | [23456789]  | 234     | 5      | 1%                     | 1%    | 1%    | 1%  | 0% | 0%      | 0% | 1%                    | 1%    | 1%    | 1%  | 0% | 0%      | 0% |
| Phe                        | [23456789]  | 234     | 6      | 3%                     | 3%    | 3%    | 3%  | 0% | 0%      | 0% | 4%                    | 4%    | 4%    | 4%  | 0% | 0%      | 0% |
| Phe                        | [23456789]  | 234     | 7      | 8%                     | 9%    | 8%    | 8%  | 1% | 0%      | 0% | 10%                   | 10%   | 10%   | 10% | 0% | 0%      | 0% |
| Phe                        | [23456789]  | 234     | 8      | 84%                    | 82%   | 84%   | 83% | 1% | 0%      | 0% | 82%                   | 83%   | 82%   | 82% | 0% | 0%      | 0% |
| Phe                        | [12]        | 302     | 0      | 5%                     | 5%    | 6%    | 5%  | 0% | 93%     | 0% | 4%                    | 4%    | 4%    | 4%  | 0% | 94%     | 0% |
| Phe                        | [12]        | 302     | 1      | 3%                     | 3%    | 3%    | 3%  | 0% | 0%      | 0% | 3%                    | 3%    | 3%    | 3%  | 0% | 0%      | 0% |
| Phe                        | [12]        | 302     | 2      | 92%                    | 91%   | 91%   | 92% | 0% | 0%      | 0% | 93%                   | 93%   | 92%   | 93% | 0% | 0%      | 0% |
| Phe                        | [123456789] | 336     | 0      | 4%                     | 4%    | 4%    | 4%  | 0% | 93%     | 0% | 2%                    | 2%    | 2%    | 2%  | 0% | 95%     | 0% |
| Phe                        | [123456789] | 336     | 1      | 0%                     | 0%    | 1%    | 0%  | 0% | 0%      | 0% | 0%                    | 0%    | 0%    | 0%  | 0% | 0%      | 0% |
| Phe                        | [123456789] | 336     | 2      | 0%                     | 0%    | 0%    | 0%  | 0% | 0%      | 0% | 0%                    | 0%    | 0%    | 0%  | 0% | 0%      | 0% |
| Phe                        | [123456789] | 336     | 3      | 0%                     | 0%    | 0%    | 0%  | 0% | 0%      | 0% | 0%                    | 0%    | 0%    | 0%  | 0% | 0%      | 0% |
| Phe                        | [123456789] | 336     | 4      | 0%                     | 0%    | 0%    | 0%  | 0% | 0%      | 0% | 0%                    | 0%    | 0%    | 0%  | 0% | 0%      | 0% |
| Phe                        | [123456789] | 336     | 5      | 0%                     | 0%    | 0%    | 0%  | 0% | 0%      | 0% | 1%                    | 0%    | 0%    | 0%  | 0% | 0%      | 0% |
| Phe                        | [123456789] | 336     | 6      | 2%                     | 2%    | 2%    | 2%  | 0% | 0%      | 0% | 2%                    | 2%    | 2%    | 2%  | 0% | 0%      | 0% |
| Phe                        | [123456789] | 336     | 7      | 2%                     | 2%    | 2%    | 2%  | 0% | 0%      | 0% | 3%                    | 3%    | 3%    | 3%  | 0% | 0%      | 0% |
| Phe                        | [123456789] | 336     | 8      | 9%                     | 10%   | 9%    | 9%  | 1% | 0%      | 0% | 10%                   | 10%   | 11%   | 10% | 0% | 0%      | 0% |
| Phe                        | [123456789] | 336     | 9      | 82%                    | 81%   | 82%   | 82% | 1% | 0%      | 0% | 81%                   | 82%   | 81%   | 81% | 0% | 0%      | 0% |
| Pro                        | [2345]      | 184     | 0      | 8%                     | 8%    | 9%    | 8%  | 0% | 79%     | 0% | 8%                    | 7%    | 8%    | 8%  | 0% | 76%     | 2% |
| Pro                        | [2345]      | 184     | 1      | 5%                     | 5%    | 6%    | 5%  | 0% | 0%      | 0% | 6%                    | 6%    | 8%    | 7%  | 1% | 0%      | 0% |
| Pro                        | [2345]      | 184     | 2      | 11%                    | 11%   | 12%   | 12% | 0% | 0%      | 0% | 14%                   | 14%   | 16%   | 15% | 1% | 0%      | 0% |
| Pro                        | [2345]      | 184     | 3      | 11%                    | 11%   | 10%   | 11% | 0% | 0%      | 0% | 14%                   | 14%   | 15%   | 15% | 0% | 0%      | 0% |
| Pro                        | [2345]      | 184     | 4      | 64%                    | 64%   | 63%   | 64% | 1% | 0%      | 0% | 58%                   | 58%   | 53%   | 56% | 3% | 0%      | 0% |
| Pro                        | [2345]      | 258     | 0      | 5%                     | 4%    | 5%    | 4%  | 0% | 87%     | 0% | 3%                    | 4%    | 4%    | 4%  | 0% | 84%     | 1% |
| Pro                        | [2345]      | 258     | 1      | 3%                     | 3%    | 3%    | 3%  | 0% | 0%      | 0% | 4%                    | 4%    | 5%    | 4%  | 1% | 0%      | 0% |
| Pro                        | [2345]      | 258     | 2      | 8%                     | 8%    | 8%    | 8%  | 0% | 0%      | 0% | 11%                   | 11%   | 12%   | 11% | 1% | 0%      | 0% |
| Pro                        | [2345]      | 258     | 3      | 10%                    | 10%   | 9%    | 10% | 1% | 0%      | 0% | 13%                   | 14%   | 14%   | 14% | 0% | 0%      | 0% |
| Pro                        | [2345]      | 258     | 4      | 74%                    | 75%   | 75%   | 74% | 0% | 0%      | 0% | 68%                   | 68%   | 66%   | 67% | 1% | 0%      | 0% |
| Ser                        | [23]        | 288     | 0      | 2%                     | 2%    | 2%    | 2%  | 0% | 94%     | 0% | 2%                    | 2%    | 2%    | 2%  | 0% | 95%     | 0% |
| Ser                        | [23]        | 288     | 1      | 7%                     | 8%    | 7%    | 8%  | 0% | 0%      | 0% | 6%                    | 7%    | 6%    | 6%  | 0% | 0%      | 0% |
| Ser                        | [23]        | 288     | 2      | 91%                    | 90%   | 91%   | 91% | 0% | 0%      | 0% | 92%                   | 91%   | 92%   | 92% | 1% | 0%      | 0% |



# Supplementary Tables

**Table S2. Isotopomer abundances of intracellular metabolites from poplar cell suspensions grown under light and dark for 7 d.**

| Fragments (↓)   Labels (→) |             |         |        | 98% U-13C, under light |       |       |     |    |         |    |       | 98% U-13C, under dark |       |     |    |         |    |  |  |
|----------------------------|-------------|---------|--------|------------------------|-------|-------|-----|----|---------|----|-------|-----------------------|-------|-----|----|---------|----|--|--|
| AA                         | frag        | MW-frag | n(m+n) | Rep 1                  | Rep 2 | Rep 3 | Avg | SD | 13C Enr | SD | Rep 1 | Rep 2                 | Rep 3 | Avg | SD | 13C Enr | SD |  |  |
| Ser                        | [12]        | 302     | 0      | 3%                     | 4%    | 4%    | 4%  | 0% | 93%     | 1% | 4%    | 3%                    | 4%    | 4%  | 0% | 92%     | 0% |  |  |
| Ser                        | [12]        | 302     | 1      | 6%                     | 9%    | 7%    | 8%  | 2% | 0%      | 0% | 9%    | 10%                   | 9%    | 9%  | 0% | 0%      | 0% |  |  |
| Ser                        | [12]        | 302     | 2      | 90%                    | 87%   | 89%   | 89% | 2% | 0%      | 0% | 87%   | 87%                   | 87%   | 87% | 0% | 0%      | 0% |  |  |
| Ser                        | [23]        | 362     | 0      | 2%                     | 2%    | 2%    | 2%  | 0% | 95%     | 0% | 2%    | 2%                    | 2%    | 2%  | 0% | 95%     | 0% |  |  |
| Ser                        | [23]        | 362     | 1      | 7%                     | 8%    | 7%    | 7%  | 0% | 0%      | 0% | 6%    | 6%                    | 6%    | 6%  | 0% | 0%      | 0% |  |  |
| Ser                        | [23]        | 362     | 2      | 92%                    | 91%   | 91%   | 91% | 0% | 0%      | 0% | 92%   | 92%                   | 92%   | 92% | 0% | 0%      | 0% |  |  |
| Ser                        | [123]       | 390     | 0      | 1%                     | 1%    | 2%    | 2%  | 0% | 94%     | 0% | 2%    | 2%                    | 2%    | 2%  | 0% | 94%     | 0% |  |  |
| Ser                        | [123]       | 390     | 1      | 2%                     | 2%    | 2%    | 2%  | 0% | 0%      | 0% | 2%    | 2%                    | 2%    | 2%  | 0% | 0%      | 0% |  |  |
| Ser                        | [123]       | 390     | 2      | 7%                     | 9%    | 8%    | 8%  | 1% | 0%      | 0% | 8%    | 7%                    | 7%    | 7%  | 1% | 0%      | 0% |  |  |
| Ser                        | [123]       | 390     | 3      | 89%                    | 88%   | 88%   | 88% | 1% | 0%      | 0% | 88%   | 89%                   | 90%   | 89% | 1% | 0%      | 0% |  |  |
| Thr                        | [234]       | 376     | 0      | 7%                     | 7%    | 8%    | 7%  | 0% | 84%     | 1% | 7%    | 8%                    | 7%    | 7%  | 1% | 83%     | 3% |  |  |
| Thr                        | [234]       | 376     | 1      | 7%                     | 7%    | 7%    | 7%  | 0% | 0%      | 0% | 9%    | -1%                   | 10%   | 6%  | 6% | 0%      | 0% |  |  |
| Thr                        | [234]       | 376     | 2      | 12%                    | 12%   | 12%   | 12% | 0% | 0%      | 0% | 16%   | 17%                   | 18%   | 17% | 1% | 0%      | 0% |  |  |
| Thr                        | [234]       | 376     | 3      | 74%                    | 74%   | 72%   | 73% | 1% | 0%      | 0% | 68%   | 75%                   | 65%   | 69% | 5% | 0%      | 0% |  |  |
| Thr                        | [1234]      | 404     | 0      | 7%                     | 6%    | 7%    | 7%  | 0% | 83%     | 1% | 6%    | 7%                    | 7%    | 6%  | 0% | 81%     | 2% |  |  |
| Thr                        | [1234]      | 404     | 1      | 3%                     | 3%    | 3%    | 3%  | 0% | 0%      | 0% | 5%    | 4%                    | 6%    | 5%  | 1% | 0%      | 0% |  |  |
| Thr                        | [1234]      | 404     | 2      | 7%                     | 7%    | 8%    | 7%  | 0% | 0%      | 0% | 10%   | 9%                    | 12%   | 10% | 1% | 0%      | 0% |  |  |
| Thr                        | [1234]      | 404     | 3      | 13%                    | 14%   | 14%   | 14% | 0% | 0%      | 0% | 15%   | 17%                   | 16%   | 16% | 1% | 0%      | 0% |  |  |
| Thr                        | [1234]      | 404     | 4      | 69%                    | 69%   | 68%   | 69% | 1% | 0%      | 0% | 65%   | 63%                   | 59%   | 62% | 3% | 0%      | 0% |  |  |
| Tyr                        | [12]        | 302     | 0      | 8%                     | 8%    | 8%    | 8%  | 0% | 91%     | 0% | 7%    | 7%                    | 7%    | 7%  | 0% | 91%     | 0% |  |  |
| Tyr                        | [12]        | 302     | 1      | 3%                     | 3%    | 2%    | 3%  | 1% | 0%      | 0% | 4%    | 3%                    | 3%    | 4%  | 0% | 0%      | 0% |  |  |
| Tyr                        | [12]        | 302     | 2      | 90%                    | 89%   | 90%   | 90% | 0% | 0%      | 0% | 89%   | 89%                   | 89%   | 89% | 0% | 0%      | 0% |  |  |
| Tyr                        | [23456789]  | 364     | 0      | 6%                     | 6%    |       | 6%  | 0% | 90%     | 0% | 5%    | 5%                    | 5%    | 5%  | 0% | 92%     | 1% |  |  |
| Tyr                        | [23456789]  | 364     | 1      | 1%                     | 1%    |       | 1%  | 0% | 0%      | 0% | 1%    | 0%                    | 1%    | 1%  | 0% | 0%      | 0% |  |  |
| Tyr                        | [23456789]  | 364     | 2      | 0%                     | 0%    |       | 0%  | 0% | 0%      | 0% | 0%    | 1%                    | 0%    | 0%  | 1% | 0%      | 0% |  |  |
| Tyr                        | [23456789]  | 364     | 3      | 0%                     | 0%    |       | 0%  | 0% | 0%      | 0% | 0%    | 0%                    | 0%    | 0%  | 0% | 0%      | 0% |  |  |
| Tyr                        | [23456789]  | 364     | 4      | 0%                     | 0%    |       | 0%  | 0% | 0%      | 0% | 0%    | 1%                    | 0%    | 0%  | 0% | 0%      | 0% |  |  |
| Tyr                        | [23456789]  | 364     | 5      | 1%                     | 1%    |       | 1%  | 1% | 0%      | 0% | 1%    | 1%                    | 1%    | 1%  | 0% | 0%      | 0% |  |  |
| Tyr                        | [23456789]  | 364     | 6      | 4%                     | 4%    |       | 4%  | 0% | 0%      | 0% | 5%    | 2%                    | 3%    | 3%  | 2% | 0%      | 0% |  |  |
| Tyr                        | [23456789]  | 364     | 7      | 11%                    | 9%    |       | 10% | 1% | 0%      | 0% | 10%   | 12%                   | 8%    | 10% | 2% | 0%      | 0% |  |  |
| Tyr                        | [23456789]  | 364     | 8      | 78%                    | 78%   |       | 78% | 0% | 0%      | 0% | 78%   | 78%                   | 82%   | 79% | 2% | 0%      | 0% |  |  |
| Tyr                        | [123456789] | 466     | 0      | 5%                     | 5%    |       | 5%  | 0% | 92%     | 0% | 6%    | 4%                    | 5%    | 5%  | 1% | 91%     | 1% |  |  |
| Tyr                        | [123456789] | 466     | 1      | 1%                     | 1%    |       | 1%  | 0% | 0%      | 0% | 1%    | 1%                    | 1%    | 1%  | 1% | 0%      | 0% |  |  |
| Tyr                        | [123456789] | 466     | 2      | -1%                    | 0%    |       | 0%  | 1% | 0%      | 0% | 0%    | 0%                    | 0%    | 0%  | 0% | 0%      | 0% |  |  |
| Tyr                        | [123456789] | 466     | 3      | 1%                     | 0%    |       | 0%  | 0% | 0%      | 0% | 0%    | 0%                    | 0%    | 0%  | 0% | 0%      | 0% |  |  |
| Tyr                        | [123456789] | 466     | 4      | 0%                     | 0%    |       | 0%  | 0% | 0%      | 0% | 0%    | 0%                    | 0%    | 0%  | 0% | 0%      | 0% |  |  |
| Tyr                        | [123456789] | 466     | 5      | 1%                     | 0%    |       | 0%  | 0% | 0%      | 0% | 0%    | 0%                    | 0%    | 0%  | 0% | 0%      | 0% |  |  |
| Tyr                        | [123456789] | 466     | 6      | 0%                     | 1%    |       | 1%  | 1% | 0%      | 0% | 2%    | 2%                    | 2%    | 2%  | 0% | 0%      | 0% |  |  |
| Tyr                        | [123456789] | 466     | 7      | 3%                     | 3%    |       | 3%  | 0% | 0%      | 0% | 3%    | 3%                    | 3%    | 3%  | 0% | 0%      | 0% |  |  |
| Tyr                        | [123456789] | 466     | 8      | 9%                     | 9%    |       | 9%  | 0% | 0%      | 0% | 11%   | 9%                    | 10%   | 10% | 1% | 0%      | 0% |  |  |

# Supplementary Tables

**Table S2. Isotopomer abundances of intracellular metabolites from poplar cell suspensions grown under light and dark for 7 d.**

| Fragments (↓)   Labels (→) |             |         |        | 98% U-13C, under light |       |       |     |    |         |    | 98% U-13C, under dark |       |       |     |    |         |    |
|----------------------------|-------------|---------|--------|------------------------|-------|-------|-----|----|---------|----|-----------------------|-------|-------|-----|----|---------|----|
| AA                         | frag        | MW-frag | n(m+n) | Rep 1                  | Rep 2 | Rep 3 | Avg | SD | 13C Enr | SD | Rep 1                 | Rep 2 | Rep 3 | Avg | SD | 13C Enr | SD |
| Tyr                        | [123456789] | 466     | 9      | 81%                    | 80%   |       | 80% | 1% | 0%      | 0% | 78%                   |       | 79%   | 78% | 1% | 0%      | 0% |
| Val                        | [2345]      | 186     | 0      | 4%                     | 4%    | 5%    | 5%  | 0% | 91%     | 0% | 5%                    | 5%    | 5%    | 5%  | 0% | 90%     | 0% |
| Val                        | [2345]      | 186     | 1      | 1%                     | 1%    | 1%    | 1%  | 0% | 0%      | 0% | 1%                    | 1%    | 1%    | 1%  | 0% | 0%      | 0% |
| Val                        | [2345]      | 186     | 2      | 3%                     | 3%    | 4%    | 3%  | 0% | 0%      | 0% | 4%                    | 4%    | 4%    | 4%  | 0% | 0%      | 0% |
| Val                        | [2345]      | 186     | 3      | 7%                     | 10%   | 7%    | 8%  | 1% | 0%      | 0% | 10%                   | 10%   | 11%   | 11% | 1% | 0%      | 0% |
| Val                        | [2345]      | 186     | 4      | 84%                    | 82%   | 83%   | 83% | 1% | 0%      | 0% | 80%                   | 80%   | 79%   | 80% | 1% | 0%      | 0% |
| Val                        | [2345]      | 260     | 0      | 4%                     | 5%    | 5%    | 5%  | 0% | 91%     | 0% | 5%                    | 5%    | 5%    | 5%  | 0% | 90%     | 0% |
| Val                        | [2345]      | 260     | 1      | 1%                     | 1%    | 1%    | 1%  | 0% | 0%      | 0% | 1%                    | 1%    | 1%    | 1%  | 0% | 0%      | 0% |
| Val                        | [2345]      | 260     | 2      | 3%                     | 3%    | 4%    | 3%  | 0% | 0%      | 0% | 4%                    | 4%    | 4%    | 4%  | 0% | 0%      | 0% |
| Val                        | [2345]      | 260     | 3      | 6%                     | 7%    | 7%    | 7%  | 1% | 0%      | 0% | 8%                    | 8%    | 8%    | 8%  | 0% | 0%      | 0% |
| Val                        | [2345]      | 260     | 4      | 85%                    | 84%   | 84%   | 84% | 1% | 0%      | 0% | 83%                   | 82%   | 82%   | 82% | 0% | 0%      | 0% |
| Val                        | [12345]     | 288     | 0      | 5%                     | 4%    | 5%    | 5%  | 0% | 91%     | 0% | 5%                    | 5%    | 5%    | 5%  | 0% | 90%     | 0% |
| Val                        | [12345]     | 288     | 1      | 1%                     | 1%    | 1%    | 1%  | 0% | 0%      | 0% | 0%                    | 0%    | 1%    | 0%  | 0% | 0%      | 0% |
| Val                        | [12345]     | 288     | 2      | 1%                     | 2%    | 2%    | 2%  | 0% | 0%      | 0% | 2%                    | 2%    | 2%    | 2%  | 0% | 0%      | 0% |
| Val                        | [12345]     | 288     | 3      | 3%                     | 3%    | 3%    | 3%  | 0% | 0%      | 0% | 4%                    | 3%    | 4%    | 4%  | 0% | 0%      | 0% |
| Val                        | [12345]     | 288     | 4      | 6%                     | 8%    | 7%    | 7%  | 1% | 0%      | 0% | 8%                    | 8%    | 9%    | 8%  | 0% | 0%      | 0% |
| Val                        | [12345]     | 288     | 5      | 84%                    | 82%   | 83%   | 83% | 1% | 0%      | 0% | 81%                   | 81%   | 80%   | 81% | 1% | 0%      | 0% |
| Val                        | [12]        | 302     | 0      | 7%                     | 7%    | 8%    | 8%  | 0% | 91%     | 0% | 9%                    | 9%    | 9%    | 9%  | 0% | 90%     | 1% |
| Val                        | [12]        | 302     | 1      | 3%                     | 4%    | 3%    | 4%  | 0% | 0%      | 0% | 0%                    | 3%    | 4%    | 2%  | 3% | 0%      | 0% |
| Val                        | [12]        | 302     | 2      | 89%                    | 89%   | 89%   | 89% | 1% | 0%      | 0% | 91%                   | 88%   | 87%   | 89% | 2% | 0%      | 0% |

# Supplementary Tables

**Table S3. Metabolic fluxes estimated through the four metabolic models.**

| Iso_corr(U) |         |        | Gluc_dilu |         |        | Iso_corr(V) |         |        | AA_in    |         |        |
|-------------|---------|--------|-----------|---------|--------|-------------|---------|--------|----------|---------|--------|
| Reaction    | Avg     | SD     | Reaction  | Avg     | SD     | Reaction    | Avg     | SD     | Reaction | Avg     | SD     |
| glci        | 0.5604  | 0.0080 | glci      | 0.5508  | 0.0017 | glci        | 0.5713  | 0.0123 | glci     | 0.5698  | 0.0105 |
| CO2in       | 0.1594  | 0.0046 | CO2in     | 0.1283  | 0.0058 | CO2in       | 0.9024  | 0.0687 | CO2in    | 0.1862  | 0.1570 |
| CO2out      | 1.9886  | 0.0697 | CO2out    | 2.0405  | 0.0407 | CO2out      | 3.0591  | 0.1274 | CO2out   | 2.4669  | 0.1774 |
|             |         |        |           |         |        |             |         |        | CO2exf   | -0.1429 | 0.1573 |
|             |         |        |           |         |        |             |         |        | CO2exb   | 0.7763  | 0.2601 |
|             |         |        |           |         |        | Alai        | 0.0002  | 0.0001 | Alai     | 0.0018  | 0.0017 |
|             |         |        |           |         |        | aspi        | 0.0011  | 0.0001 | aspi     | 0.0016  | 0.0004 |
|             |         |        |           |         |        | glui        | 0.0012  | 0.0001 | glui     | 0.0011  | 0.0012 |
|             |         |        |           |         |        | Glyi        | 0.0001  | 0.0001 | Glyi     | 0.0003  | 0.0003 |
|             |         |        |           |         |        | hisi        | 0.0001  | 0.0000 | hisi     | 0.0001  | 0.0000 |
|             |         |        |           |         |        | Ile         | 0.0010  | 0.0001 | Ile      | 0.0008  | 0.0001 |
|             |         |        |           |         |        | Meti        | 0.0001  | 0.0001 | Meti     | 0.0001  | 0.0001 |
|             |         |        |           |         |        | seri        | 0.0007  | 0.0001 | seri     | 0.0007  | 0.0003 |
|             |         |        |           |         |        | thri        | 0.0001  | 0.0001 | thri     | 0.0003  | 0.0001 |
|             |         |        |           |         |        | Vali        | 0.0021  | 0.0002 | Vali     | 0.0016  | 0.0004 |
|             |         |        |           |         |        | leu         | 0.0025  | 0.0001 | leu      | 0.0019  | 0.0001 |
|             |         |        |           |         |        |             |         |        | pyrpi    | 0.0008  | 0.0002 |
|             |         |        |           |         |        |             |         |        | OAAmi    | 0.0025  | 0.0015 |
|             |         |        |           |         |        |             |         |        | pyr      | 0.0009  | 0.0004 |
|             |         |        |           |         |        |             |         |        | suci     | 0.0078  | 0.0013 |
|             |         |        |           |         |        |             |         |        | starchi  | 0.0044  | 0.0006 |
|             |         |        |           |         |        |             |         |        | T3Ppi    | 0.0024  | 0.0012 |
|             |         |        |           |         |        |             |         |        | E4Ppi    | 0.0014  | 0.0008 |
|             |         |        |           |         |        |             |         |        | ACAapi   | 0.0094  | 0.0011 |
|             |         |        |           |         |        |             |         |        | ACAin    | 0.0083  | 0.0031 |
|             |         |        |           |         |        |             |         |        | ACAif    | 0.0083  | 0.0031 |
|             |         |        | glcina    | 0.0237  | 0.0002 |             |         |        |          |         |        |
|             |         |        | glcc2     | 0.0237  | 0.0002 |             |         |        |          |         |        |
| pgif        | 0.1709  | 0.0508 | pgif      | 0.1625  | 0.0457 | pgif        | 0.3924  | 0.0846 | pgif     | 0.3577  | 0.1008 |
| pgib        | 0.9334  | 0.0514 | pgib      | 0.8852  | 0.0778 | pgib        | 0.4740  | 0.2885 | pgib     | 0.3712  | 0.3095 |
| g6pdh       | 0.2430  | 0.0945 | g6pdh     | 0.3683  | 0.0487 | g6pdh       | 0.1092  | 0.0657 | g6pdh    | 0.1651  | 0.0709 |
| tktAf       | 0.0674  | 0.0217 | tktAf     | 0.1051  | 0.0220 | tktAf       | -0.0459 | 0.0356 | tktAf    | -0.0130 | 0.0647 |
| tktAb       | 0.5347  | 0.2868 | tktAb     | 0.2864  | 0.2411 | tktAb       | 0.0880  | 0.1443 | tktAb    | 0.3276  | 0.3125 |
| talf        | 0.0674  | 0.0217 | talf      | 0.1051  | 0.0220 | talf        | -0.0459 | 0.0356 | talf     | -0.0130 | 0.0647 |
| talb        | 0.5207  | 0.3118 | talb      | 0.2933  | 0.2745 | talb        | 0.6646  | 0.3356 | talb     | 0.7689  | 0.2946 |
| tktBf       | 0.0674  | 0.0217 | tktBf     | 0.1051  | 0.0220 | tktBf       | -0.0532 | 0.0341 | tktBf    | -0.0184 | 0.0647 |
| tktBb       | 0.3079  | 0.2150 | tktBb     | 0.2863  | 0.2506 | tktBb       | 0.9373  | 0.0405 | tktBb    | 0.7768  | 0.2193 |
| pfk         | 0.2865  | 0.0480 | pfk       | 0.3531  | 0.0607 | pfk         | 0.2667  | 0.0481 | pfk      | 0.3071  | 0.0659 |
| f16bp       | 0.9248  | 0.0681 | f16bp     | 0.6208  | 0.2342 | f16bp       | 0.7474  | 0.0849 | f16bp    | 0.5756  | 0.1958 |
| pyrf        | 0.6546  | 0.0373 | pyrf      | 0.0000  | 0.0000 | pyrf        | 0.8826  | 0.2968 | pyrf     | 0.8414  | 0.2060 |
| g6pt        | 0.1464  | 0.1138 | g6pt      | 0.0436  | 0.0700 | g6pt        | 0.0697  | 0.0901 | g6pt     | 0.0470  | 0.0591 |
| g6ptb       | 0.5937  | 0.2248 | g6ptb     | 0.6100  | 0.3604 | g6ptb       | 0.4748  | 0.2185 | g6ptb    | 0.2965  | 0.2715 |
| pgifp       | -0.5388 | 0.1164 | pgifp     | -0.0267 | 0.0694 | pgifp       | -0.7036 | 0.1867 | pgifp    | -0.4002 | 0.2359 |
| pgibp       | 0.3406  | 0.2888 | pgibp     | 0.5990  | 0.3288 | pgibp       | 0.8579  | 0.1119 | pgibp    | 0.8545  | 0.2269 |
| g6pdhp      | 0.6635  | 0.0967 | g6pdhp    | 0.0473  | 0.0070 | g6pdhp      | 0.7531  | 0.1938 | g6pdhp   | 0.4301  | 0.2293 |
| tktAfp      | 0.2367  | 0.0437 | tktAfp    | 0.0355  | 0.0321 | tktAfp      | 0.3354  | 0.0757 | tktAfp   | 0.2128  | 0.1120 |
| tktAbp      | 0.1546  | 0.1931 | tktAbp    | 0.3758  | 0.2754 | tktAbp      | 0.9889  | 0.0203 | tktAbp   | 0.9950  | 0.0120 |
| talfp       | 0.2367  | 0.0437 | talfp     | 0.0355  | 0.0321 | talfp       | 0.3354  | 0.0757 | talfp    | 0.2128  | 0.1120 |
| talbp       | 0.2584  | 0.2911 | talbp     | 0.5037  | 0.3291 | talbp       | 0.9687  | 0.0331 | talbp    | 0.9847  | 0.0264 |
| tktBfp      | 0.2297  | 0.0434 | tktBfp    | 0.0279  | 0.0313 | tktBfp      | 0.3354  | 0.0757 | tktBfp   | 0.2128  | 0.1120 |
| tktBbp      | 0.0960  | 0.1268 | tktBbp    | 0.4942  | 0.3271 | tktBbp      | 0.7960  | 0.2242 | tktBbp   | 0.8536  | 0.2291 |
| pfkp        | -0.0724 | 0.0555 | pfkp      | 0.0367  | 0.0593 | pfkp        | 0.0254  | 0.0554 | pfkp     | 0.0254  | 0.0554 |
| f16bpp      | 0.7685  | 0.1209 | f16bpp    | 0.5604  | 0.3289 | f16bpp      | 0.1769  | 0.2562 | f16bpp   | 0.3931  | 0.2452 |
| pepfp       | 0.0749  | 0.0301 | pepfp     | 0.9111  | 0.0585 | pepfp       | 0.2422  | 0.2450 | pepfp    | 0.1374  | 0.1409 |

# Supplementary Tables

**Table S3. Metabolic fluxes estimated through the four metabolic models.**

| Iso_corr(U) |         |        | Gluc_dilu |         |        | Iso_corr(V) |         |        | AA_in    |         |        |
|-------------|---------|--------|-----------|---------|--------|-------------|---------|--------|----------|---------|--------|
| Reaction    | Avg     | SD     | Reaction  | Avg     | SD     | Reaction    | Avg     | SD     | Reaction | Avg     | SD     |
| pdhp        | 0.2296  | 0.0037 | pdhp      | 0.2312  | 0.0026 | pdhp        | 0.2266  | 0.0030 | pdhp     | 0.2164  | 0.0033 |
| t3pt        | -0.0176 | 0.1039 | t3pt      | -0.8401 | 0.1548 | t3pt        | 0.0168  | 0.2477 | t3pt     | 0.1159  | 0.1636 |
| t3pb        | 0.2802  | 0.2850 | t3pb      | 0.0486  | 0.1576 | t3pb        | 0.1761  | 0.2525 | t3pb     | 0.0944  | 0.1899 |
| P5Ptf       | 0.0410  | 0.1280 | P5Ptf     | 0.0531  | 0.0973 | P5Ptf       | 0.2542  | 0.0882 | P5Ptf    | 0.2096  | 0.1437 |
| P5Ptr       | 0.6841  | 0.3162 | P5Ptr     | 0.5951  | 0.3308 | P5Ptr       | 0.0422  | 0.0645 | P5Ptr    | 0.0481  | 0.1297 |
| pyrtpf      | 0.2223  | 0.0314 | pyrtpf    | -0.6121 | 0.0586 | pyrtpf      | 0.0414  | 0.2440 | pyrtpf   | 0.1601  | 0.1471 |
| pyrtpr      | 0.4049  | 0.2644 | pyrtpr    | 0.4663  | 0.3775 | pyrtpr      | 0.8668  | 0.2177 | pyrtpr   | 0.7409  | 0.3746 |
| pdh         | 0.3211  | 0.0385 | pdh       | 0.5022  | 0.0204 | pdh         | 0.3685  | 0.0436 | pdh      | 0.4844  | 0.0616 |
| citdh       | 0.3211  | 0.0385 | citdh     | 0.5022  | 0.0204 | citdh       | 0.3685  | 0.0436 | citdh    | 0.4927  | 0.0627 |
| akgdh       | 0.2749  | 0.0394 | akgdh     | 0.4553  | 0.0216 | akgdh       | 0.3389  | 0.0427 | akgdh    | 0.4623  | 0.0626 |
| sdhf        | 0.2749  | 0.0394 | sdhf      | 0.4553  | 0.0216 | sdhf        | 0.3389  | 0.0427 | sdhf     | 0.4735  | 0.0586 |
| sdhr        | 0.9638  | 0.0257 | sdhr      | 0.9366  | 0.0442 | sdhr        | 0.9859  | 0.0154 | sdhr     | 0.9596  | 0.0378 |
| sdhs        | 0.6807  | 0.2441 | sdhs      | 0.6774  | 0.2549 | sdhs        | 0.6570  | 0.3330 | sdhs     | 0.3905  | 0.3322 |
| mdhf        | 0.3283  | 0.0444 | mdhf      | 0.4920  | 0.0465 | mdhf        | 0.6244  | 0.2189 | mdhf     | 0.4902  | 0.1463 |
| mdhr        | 0.9627  | 0.0227 | mdhr      | 0.9493  | 0.0474 | mdhr        | 0.9337  | 0.0887 | mdhr     | 0.9339  | 0.1436 |
| mef         | -0.0534 | 0.0357 | mef       | -0.0367 | 0.0423 | mef         | -0.2856 | 0.1947 | mef      | -0.0167 | 0.1329 |
| mer         | 0.2691  | 0.2769 | mer       | 0.6386  | 0.2282 | mer         | 0.2663  | 0.1885 | mer      | 0.3278  | 0.2335 |
| pyrc        | 0.0452  | 0.0268 | pyrc      | 0.0602  | 0.0246 | pyrc        | 0.1722  | 0.2276 | pyrc     | 0.1676  | 0.1103 |
| pepck       | 0.0340  | 0.0474 | pepck     | 0.0310  | 0.0525 | pepck       | 0.4012  | 0.1340 | pepck    | 0.1410  | 0.0875 |
| pepc        | 0.9710  | 0.0163 | pepc      | 0.9218  | 0.0353 | pepc        | 0.1748  | 0.2070 | pepc     | 0.1850  | 0.2102 |
|             |         |        |           |         |        | mgdhf       | 0.0296  | 0.0023 | mgdhf    | 0.0303  | 0.0026 |
|             |         |        |           |         |        |             |         |        | mgdhr    | 0.7068  | 0.3379 |
| Serf        | 0.0115  | 0.0004 | Serf      | 0.0116  | 0.0004 | Serf        | 0.0104  | 0.0007 | Serf     | 0.0104  | 0.0007 |
| Serb        | 0.9704  | 0.0185 | Serb      | 0.9277  | 0.0591 |             |         |        | Serb     | 0.5454  | 0.2438 |
| Glyf        | 0.0076  | 0.0004 | Glyf      | 0.0077  | 0.0004 | Glyf        | 0.0074  | 0.0005 | Glyf     | 0.0072  | 0.0006 |
| Glyr        | 0.9805  | 0.0123 | Glyr      | 0.9456  | 0.0558 | Glyr        | 0.6071  | 0.0221 | Glyr     | 0.7329  | 0.0979 |
|             |         |        |           |         |        | alaf        | 0.0124  | 0.0008 | alaf     | 0.0109  | 0.0017 |
|             |         |        |           |         |        |             |         |        | alar     | 0.8792  | 0.1874 |
|             |         |        |           |         |        | aspf        | 0.0148  | 0.0004 | aspf     | 0.0144  | 0.0005 |
|             |         |        |           |         |        |             |         |        | aspr     | 0.3232  | 0.1765 |
|             |         |        |           |         |        | hisf        | 0.0011  | 0.0003 | hisf     | 0.0012  | 0.0003 |
|             |         |        |           |         |        | ilef        | 0.0064  | 0.0001 | ilef     | 0.0066  | 0.0001 |
|             |         |        |           |         |        | metf        | 0.0009  | 0.0001 | metf     | 0.0009  | 0.0001 |
|             |         |        |           |         |        | thrf        | 0.0091  | 0.0001 | thrf     | 0.0090  | 0.0001 |
|             |         |        |           |         |        | valf        | 0.0239  | 0.0002 | valf     | 0.0363  | 0.0090 |
|             |         |        |           |         |        |             |         |        | valcat   | 0.0112  | 0.0094 |
|             |         |        |           |         |        | leu3f       | 0.0181  | 0.0001 | leu3f    | 0.0187  | 0.0002 |
| T3Ppo       | 0.0162  | 0.0042 | T3Ppo     | 0.0188  | 0.0028 |             |         |        |          |         |        |
| T3Po        | 0.0021  | 0.0001 | T3Po      | 0.0021  | 0.0001 |             |         |        |          |         |        |
| Sero        | 0.0039  | 0.0001 | Sero      | 0.0039  | 0.0001 | Sero        | 0.0040  | 0.0001 | Sero     | 0.0039  | 0.0001 |
| Glyo        | 0.0076  | 0.0004 | Glyo      | 0.0077  | 0.0004 | Glyo        | 0.0075  | 0.0005 | Glyo     | 0.0075  | 0.0004 |
| E4Ppo       | 0.0069  | 0.0025 | E4Ppo     | 0.0076  | 0.0023 | E4Po        | 0.0073  | 0.0025 | E4Po     | 0.0067  | 0.0021 |
| Pyro        | 0.0126  | 0.0007 | pyro      | 0.0129  | 0.0006 | pyro        | 0.0027  | 0.0002 | pyro     | 0.0026  | 0.0002 |
| pyrpo       | 0.0676  | 0.0005 | pyrpo     | 0.0678  | 0.0004 | pyrpo       | 0.0026  | 0.0001 | pyrpo    | 0.0026  | 0.0001 |
| ACApo       | 0.2296  | 0.0037 | ACApo     | 0.2312  | 0.0026 |             |         |        |          |         |        |
| OAAmo       | 0.0185  | 0.0013 | OAAmo     | 0.0191  | 0.0015 | OAAmo       | 0.0112  | 0.0011 | OAAmo    | 0.0113  | 0.0009 |
| Gluco       | 0.0461  | 0.0037 | 2OGmo     | 0.0469  | 0.0036 |             |         |        |          |         |        |
| G6Ppout     | 0.0217  | 0.0021 | G6Ppo     | 0.0230  | 0.0020 |             |         |        |          |         |        |
| P5Ppout     | 0.0014  | 0.0004 | P5Ppo     | 0.0015  | 0.0004 |             |         |        |          |         |        |
| F6Po        | 0.0191  | 0.0009 | F6Po      | 0.0195  | 0.0007 |             |         |        |          |         |        |
| CHOo        | 0.0076  | 0.0004 | CHOo      | 0.0077  | 0.0004 | CHOo        | 0.0054  | 0.0005 | CHOo     | 0.0050  | 0.0007 |
|             |         |        |           |         |        | Alao        | 0.0127  | 0.0008 | Alao     | 0.0127  | 0.0006 |

# Supplementary Tables

**Table S3. Metabolic fluxes estimated through the four metabolic models.**

| Iso_corr(U) |     |    | Gluc_dilu |     |    | Iso_corr(V) |        | AA_in    |         |        |        |
|-------------|-----|----|-----------|-----|----|-------------|--------|----------|---------|--------|--------|
| Reaction    | Avg | SD | Reaction  | Avg | SD |             |        | Reaction | Avg     | SD     |        |
|             |     |    |           |     |    | Aspo        | 0.0068 | 0.0004   | Aspo    | 0.0070 | 0.0003 |
|             |     |    |           |     |    | Gluo        | 0.0308 | 0.0024   | Gluo    | 0.0314 | 0.0022 |
|             |     |    |           |     |    | Hiso        | 0.0012 | 0.0003   | Hiso    | 0.0013 | 0.0003 |
|             |     |    |           |     |    | Ileo        | 0.0074 | 0.0000   | Ileo    | 0.0075 | 0.0001 |
|             |     |    |           |     |    | Meto        | 0.0010 | 0.0001   | Meto    | 0.0010 | 0.0001 |
|             |     |    |           |     |    | Thro        | 0.0027 | 0.0000   | Thro    | 0.0026 | 0.0001 |
|             |     |    |           |     |    | Valo        | 0.0080 | 0.0001   | Valo    | 0.0080 | 0.0001 |
|             |     |    |           |     |    | Leuo        | 0.0206 | 0.0001   | Leuo    | 0.0206 | 0.0001 |
|             |     |    |           |     |    | suco        | 0.0266 | 0.0013   | suco    | 0.0270 | 0.0014 |
|             |     |    |           |     |    | starcho     | 0.0203 | 0.0022   | starcho | 0.0215 | 0.0019 |
|             |     |    |           |     |    | lipid       | 0.2086 | 0.0031   | lipid   | 0.2071 | 0.0030 |

# Supplementary Tables

**Table S4. Metabolic network model incorporating uniform isotopomer correction (Iso\_corr[U]).**

| Reaction |                                                                                                           | Net flux | Flux SD | Reversibility |
|----------|-----------------------------------------------------------------------------------------------------------|----------|---------|---------------|
| glci     | → Glc                                                                                                     | 0.5604   | 0.0080  |               |
| CO2in    | → CO <sub>2</sub>                                                                                         | 0.1594   | 0.0046  |               |
| CO2out   | CO <sub>2</sub> →                                                                                         | 1.9886   | 0.0697  |               |
| pgif     | G6P (123456) → F6P (123456)                                                                               | 0.1709   | 0.0508  | 0.9334        |
| g6pdh    | G6P (123456) → P5P (23456)                                                                                | 0.2430   | 0.0945  |               |
| tktAf    | P5P (12345) + P5P (67890) → S7P (1267890) + T3P (345)                                                     | 0.0674   | 0.0217  | 0.5347        |
| talf     | S7P (1234567) + T3P (890) → F6P (123890) + E4P (4567)                                                     | 0.0674   | 0.0217  | 0.5207        |
| tktBf    | P5P (12345) + E4P (6789) → F6P (126789) + T3P (345)                                                       | 0.0674   | 0.0217  | 0.3079        |
| pfk      | F6P (123456) → T3P (321) + T3P (456)                                                                      | 0.2865   | 0.0480  | 0.9248        |
| pyrf     | T3P (123) → Pyr (123)                                                                                     | 0.6546   | 0.0373  |               |
| g6pt     | G6P (123456) → G6P <sub>p</sub> (123456)                                                                  | 0.1464   | 0.1138  | 0.5937        |
| pgifp    | G6P <sub>p</sub> (123456) → F6P <sub>p</sub> (123456)                                                     | -0.5388  | 0.1164  | 0.3406        |
| g6pdhp   | G6P <sub>p</sub> (123456) → P5P <sub>p</sub> (23456) + CO <sub>2</sub> (1)                                | 0.6635   | 0.0967  |               |
| tktAfp   | P5P <sub>p</sub> (12345) + P5P <sub>p</sub> (67890) → S7P <sub>p</sub> (1267890) + T3P <sub>p</sub> (345) | 0.2367   | 0.0437  | 0.1546        |
| talfp    | S7P <sub>p</sub> (1234567) + T3P <sub>p</sub> (890) → F6P <sub>p</sub> (123890) + E4P <sub>p</sub> (4567) | 0.2367   | 0.0437  | 0.2584        |
| tktBfp   | P5P <sub>p</sub> (12345) + E4P <sub>p</sub> (6789) → F6P <sub>p</sub> (126789) + T3P <sub>p</sub> (345)   | 0.2297   | 0.0434  | 0.0960        |
| pfkp     | F6P <sub>p</sub> (123456) → T3P <sub>p</sub> (321) + T3P <sub>p</sub> (456)                               | -0.0724  | 0.0555  | 0.7685        |
| pepfp    | T3P <sub>p</sub> (123) → Pyr <sub>p</sub> (123)                                                           | 0.0749   | 0.0301  |               |
| pdhp     | Pyr <sub>p</sub> (123) → Aca <sub>p</sub> (23)                                                            | 0.2296   | 0.0037  |               |
| t3pt     | T3P <sub>p</sub> (123) → T3P (123)                                                                        | -0.0176  | 0.1039  | 0.2802        |
| P5Ptf    | P5P (12345) → P5P <sub>p</sub> (12345)                                                                    | 0.0410   | 0.1280  | 0.6841        |
| pyrtf    | Pyr (123) → Pyr <sub>p</sub> (123)                                                                        | 0.2223   | 0.0314  | 0.4039        |
| pdh      | Pyr (123) → Aca <sub>m</sub> (23)                                                                         | 0.3211   | 0.0385  |               |
| citdh    | Aca <sub>m</sub> (12) + Oaa <sub>m</sub> (3456) → Akg <sub>m</sub> (65421) + CO <sub>2</sub> (3)          | 0.3211   | 0.0385  |               |
| akgdh    | Akg <sub>m</sub> (12345) → Suc <sub>m</sub> (2345) + CO <sub>2</sub> (1)                                  | 0.2749   | 0.0394  |               |
| sdhf     | Suc <sub>m</sub> (1234) → Mal <sub>m</sub> (1234)                                                         | 0.2749   | 0.0394  | 0.9638        |
| sdhs     | Suc <sub>m</sub> (1234) → Mal <sub>m</sub> (4321)                                                         | 0.6807   | 0.2441  |               |
| mdhf     | Mal <sub>m</sub> (1234) → Oaa <sub>m</sub> (1234)                                                         | 0.3283   | 0.0444  | 0.9627        |
| mef      | Mal <sub>m</sub> (1234) → Pyr (123) + CO <sub>2</sub> (4)                                                 | -0.0534  | 0.0357  | 0.2691        |
| pyrc     | Pyr (123) + CO <sub>2</sub> (4) → Oaa <sub>m</sub> (1234)                                                 | 0.0452   | 0.0268  |               |
| pepck    | Oaa <sub>m</sub> (1234) → T3P (123) + CO <sub>2</sub> (4)                                                 | 0.0340   | 0.0474  | 0.9710        |
| Serf     | T3P <sub>p</sub> (123) → Ser (123)                                                                        | 0.0115   | 0.0004  | 0.9704        |
| Glyf     | Ser (123) → Gly (12) + CHO (3)                                                                            | 0.0076   | 0.0004  | 0.9805        |
| T3Ppo    | T3P <sub>p</sub> →                                                                                        | 0.0162   | 0.0042  |               |
| T3Po     | T3P →                                                                                                     | 0.0021   | 0.0001  |               |
| Sero     | Ser →                                                                                                     | 0.0039   | 0.0001  |               |
| Glyo     | Gly →                                                                                                     | 0.0076   | 0.0004  |               |
| E4Ppo    | E4P <sub>p</sub> →                                                                                        | 0.0069   | 0.0025  |               |
| Pyro     | Pyr →                                                                                                     | 0.0126   | 0.0007  |               |
| pyrpo    | Pyr <sub>p</sub> →                                                                                        | 0.0676   | 0.0005  |               |
| ACApo    | Aca <sub>p</sub> →                                                                                        | 0.2296   | 0.0037  |               |
| OAAmo    | Oaa <sub>m</sub> →                                                                                        | 0.0185   | 0.0013  |               |
| Gluc     | Akg →                                                                                                     | 0.0461   | 0.0037  |               |
| G6Ppout  | G6P <sub>p</sub> →                                                                                        | 0.0217   | 0.0021  |               |
| P5Ppout  | P5P <sub>p</sub> →                                                                                        | 0.0014   | 0.0004  |               |
| F6Po     | F6P →                                                                                                     | 0.0191   | 0.0009  |               |
| CHOout   | CHO →                                                                                                     | 0.0076   | 0.0004  |               |



# Supplementary Tables

**Table S5. Metabolic network model incorporating glucose dilution (Gluc\_dilu).**

|         | Reaction                                                                                                  | Net flux | Flux SD | Reversibility |
|---------|-----------------------------------------------------------------------------------------------------------|----------|---------|---------------|
| glci    | → G6P                                                                                                     | 0.5508   | 0.0017  |               |
| CO2in   | → CO <sub>2</sub>                                                                                         | 0.1283   | 0.0058  |               |
| CO2out  | CO <sub>2</sub> →                                                                                         | 2.0405   | 0.0407  |               |
| glcina  | → G6Pn                                                                                                    | 0.0237   | 0.0002  |               |
| glcc2   | G6Pn → G6P                                                                                                | 0.0237   | 0.0002  |               |
| pgif    | G6P (123456) → F6P (123456)                                                                               | 0.1625   | 0.0457  | 0.8852        |
| g6pdh   | G6P (123456) → P5P (23456)                                                                                | 0.3683   | 0.0487  |               |
| tktAf   | P5P (12345) + P5P (67890) → S7P (1267890) + T3P (345)                                                     | 0.1051   | 0.0220  | 0.2864        |
| talF    | S7P (1234567) + T3P (890) → F6P (123890) + E4P (4567)                                                     | 0.1051   | 0.0220  | 0.2933        |
| tktBf   | P5P (12345) + E4P (6789) → F6P (126789) + T3P (345)                                                       | 0.1051   | 0.0220  | 0.2863        |
| pfk     | F6P (123456) → T3P (321) + T3P (456)                                                                      | 0.3531   | 0.0607  | 0.6208        |
| pyrf    | T3P (123) → Pyr (123)                                                                                     | 0.0000   | 0.0000  |               |
| g6pt    | G6P (123456) → G6P <sub>p</sub> (123456)                                                                  | 0.0436   | 0.0700  | 0.6100        |
| pgifp   | G6P <sub>p</sub> (123456) → F6P <sub>p</sub> (123456)                                                     | -0.0267  | 0.0694  | 0.5990        |
| g6pdhp  | G6P <sub>p</sub> (123456) → P5P <sub>p</sub> (23456) + CO <sub>2</sub> (1)                                | 0.0473   | 0.0070  |               |
| tktAfp  | P5P <sub>p</sub> (12345) + P5P <sub>p</sub> (67890) → S7P <sub>p</sub> (1267890) + T3P <sub>p</sub> (345) | 0.0355   | 0.0321  | 0.3758        |
| talfp   | S7P <sub>p</sub> (1234567) + T3P <sub>p</sub> (890) → F6P <sub>p</sub> (123890) + E4P <sub>p</sub> (4567) | 0.0355   | 0.0321  | 0.5037        |
| tktBfp  | P5P <sub>p</sub> (12345) + E4P <sub>p</sub> (6789) → F6P <sub>p</sub> (126789) + T3P <sub>p</sub> (345)   | 0.0279   | 0.0313  | 0.4942        |
| pfkp    | F6P <sub>p</sub> (123456) → T3P <sub>p</sub> (321) + T3P <sub>p</sub> (456)                               | 0.0367   | 0.0593  | 0.5604        |
| pepfp   | T3P <sub>p</sub> (123) → Pyr <sub>p</sub> (123)                                                           | 0.9111   | 0.0585  |               |
| pdhp    | Pyr <sub>p</sub> (123) → Aca <sub>p</sub> (23)                                                            | 0.2312   | 0.0026  |               |
| t3pt    | T3P <sub>p</sub> (123) → T3P (123)                                                                        | -0.8401  | 0.1548  | 0.0486        |
| P5Ptf   | P5P (12345) → P5P <sub>p</sub> (12345)                                                                    | 0.0531   | 0.0973  | 0.5951        |
| pyrtf   | Pyr (123) → Pyr <sub>p</sub> (123)                                                                        | -0.6121  | 0.0586  | 0.4663        |
| pdh     | Pyr (123) → Aca <sub>m</sub> (23)                                                                         | 0.5022   | 0.0204  |               |
| citdh   | Aca <sub>m</sub> (12) + Oaa <sub>m</sub> (3456) → Akg <sub>m</sub> (65421) + CO <sub>2</sub> (3)          | 0.5022   | 0.0204  |               |
| akgdh   | Akg <sub>m</sub> (12345) → Suc <sub>m</sub> (2345) + CO <sub>2</sub> (1)                                  | 0.4553   | 0.0216  |               |
| sdhf    | Suc <sub>m</sub> (1234) → Mal <sub>m</sub> (1234)                                                         | 0.4553   | 0.0216  | 0.9366        |
| sdhs    | Suc <sub>m</sub> (1234) → Mal <sub>m</sub> (4321)                                                         | 0.6774   | 0.2549  |               |
| mdhf    | Mal <sub>m</sub> (1234) → Oaa <sub>m</sub> (1234)                                                         | 0.4920   | 0.0465  | 0.9493        |
| mef     | Mal <sub>m</sub> (1234) → Pyr (123) + CO <sub>2</sub> (4)                                                 | -0.0367  | 0.0423  | 0.6386        |
| pyrc    | Pyr (123) + CO <sub>2</sub> (4) → Oaa <sub>m</sub> (1234)                                                 | 0.0602   | 0.0246  |               |
| pepck   | Oaa <sub>m</sub> (1234) → T3P (123) + CO <sub>2</sub> (4)                                                 | 0.0310   | 0.0525  | 0.9218        |
| Serf    | T3P <sub>p</sub> (123) → Ser (123)                                                                        | 0.0116   | 0.0004  | 0.9277        |
| Glyf    | Ser (123) → Gly (12) + CHO (3)                                                                            | 0.0077   | 0.0004  | 0.9456        |
| T3Ppo   | T3P <sub>p</sub> →                                                                                        | 0.0188   | 0.0028  |               |
| T3Po    | T3P →                                                                                                     | 0.0021   | 0.0001  |               |
| Sero    | Ser →                                                                                                     | 0.0039   | 0.0001  |               |
| Glyo    | Gly →                                                                                                     | 0.0077   | 0.0004  |               |
| E4Ppo   | E4P <sub>p</sub> →                                                                                        | 0.0076   | 0.0023  |               |
| Pyro    | Pyr →                                                                                                     | 0.0129   | 0.0006  |               |
| pyrpo   | Pyr <sub>p</sub> →                                                                                        | 0.0678   | 0.0004  |               |
| ACApo   | Aca <sub>p</sub> →                                                                                        | 0.2312   | 0.0026  |               |
| OAAmo   | Oaa <sub>m</sub> →                                                                                        | 0.0191   | 0.0015  |               |
| Gluco   | Akg →                                                                                                     | 0.0469   | 0.0036  |               |
| G6Ppout | G6P <sub>p</sub> →                                                                                        | 0.0230   | 0.0020  |               |
| P5Ppout | P5P <sub>p</sub> →                                                                                        | 0.0015   | 0.0004  |               |
| F6Po    | F6P →                                                                                                     | 0.0195   | 0.0007  |               |
| CHOout  | CHO →                                                                                                     | 0.0077   | 0.0004  |               |

# Supplementary Tables

**Table S6. Metabolic network model incorporating isotopomer correction for different amino acids (Iso\_corr[V]).**

|        | Reaction                                                                                                  | Net flux | Flux SD | Reversibility |
|--------|-----------------------------------------------------------------------------------------------------------|----------|---------|---------------|
| glci   | → Glc                                                                                                     | 0.5713   | 0.0123  |               |
| CO2in  | → CO <sub>2b</sub>                                                                                        | 0.9024   | 0.0687  |               |
| CO2out | CO <sub>2</sub> →                                                                                         | 3.0591   | 0.1274  |               |
| Alai   | → Ala                                                                                                     | 0.0002   | 0.0001  |               |
| Aspi   | → Asp                                                                                                     | 0.0011   | 0.0001  |               |
| Glui   | → Glu                                                                                                     | 0.0012   | 0.0001  |               |
| Glyi   | → Gly                                                                                                     | 0.0001   | 0.0001  |               |
| Hisi   | → His                                                                                                     | 0.0001   | 0.0000  |               |
| Ilei   | → Ile                                                                                                     | 0.0010   | 0.0001  |               |
| Meti   | → Met                                                                                                     | 0.0001   | 0.0001  |               |
| Seri   | → Ser                                                                                                     | 0.0007   | 0.0001  |               |
| Thri   | → Thr                                                                                                     | 0.0001   | 0.0001  |               |
| Vali   | → Val                                                                                                     | 0.0021   | 0.0002  |               |
| leui   | → Leu                                                                                                     | 0.0025   | 0.0001  |               |
| pgif   | G6P (123456) → F6P (123456)                                                                               | 0.3924   | 0.0846  | 0.4740        |
| g6pdh  | G6P (123456) → P5P (23456)                                                                                | 0.1092   | 0.0657  |               |
| tktAf  | P5P (12345) + P5P (67890) → S7P (1267890) + T3P (345)                                                     | -0.0459  | 0.0356  | 0.0880        |
| talf   | S7P (1234567) + T3P (890) → F6P (123890) + E4P (4567)                                                     | -0.0459  | 0.0356  | 0.6646        |
| tktBf  | P5P (12345) + E4P (6789) → F6P (126789) + T3P (345)                                                       | -0.0532  | 0.0341  | 0.9373        |
| pfk    | F6P (123456) → T3P (321) + T3P (456)                                                                      | 0.2667   | 0.0481  | 0.7474        |
| pyrf   | PEP (123) → Pyr (123)                                                                                     | 0.8826   | 0.2968  |               |
| g6pt   | G6P (123456) → G6P <sub>p</sub> (123456)                                                                  | 0.0697   | 0.0901  | 0.4748        |
| pgifp  | G6P <sub>p</sub> (123456) → F6P <sub>p</sub> (123456)                                                     | -0.7036  | 0.1867  | 0.8579        |
| g6pdhp | G6P <sub>p</sub> (123456) → P5P <sub>p</sub> (23456) + CO <sub>2</sub> (1)                                | 0.7531   | 0.1938  |               |
| tktAfp | P5P <sub>p</sub> (12345) + P5P <sub>p</sub> (67890) → S7P <sub>p</sub> (1267890) + T3P <sub>p</sub> (345) | 0.3354   | 0.0757  | 0.9889        |
| talfp  | S7P <sub>p</sub> (1234567) + T3P <sub>p</sub> (890) → F6P <sub>p</sub> (123890) + E4P <sub>p</sub> (4567) | 0.3354   | 0.0757  | 0.9687        |
| tktBfp | P5P <sub>p</sub> (12345) + E4P <sub>p</sub> (6789) → F6P <sub>p</sub> (126789) + T3P <sub>p</sub> (345)   | 0.3354   | 0.0757  | 0.7960        |
| pfkp   | F6P <sub>p</sub> (123456) → T3P <sub>p</sub> (321) + T3P <sub>p</sub> (456)                               | 0.0254   | 0.0554  | 0.1769        |
| pepfp  | T3P <sub>p</sub> (123) → Pyr <sub>p</sub> (123)                                                           | 0.2422   | 0.2450  |               |
| pdhp   | Pyr <sub>p</sub> (123) → Aca <sub>p</sub> (23)                                                            | 0.2266   | 0.0030  |               |
| t3pt   | T3P <sub>p</sub> (123) → T3P (123)                                                                        | 0.0168   | 0.2477  | 0.1761        |
| P5Ptf  | P5P (12345) → P5P <sub>p</sub> (12345)                                                                    | 0.2542   | 0.0882  | 0.0422        |
| pyrtfp | Pyr (123) → Pyr <sub>p</sub> (123)                                                                        | 0.0414   | 0.2440  | 0.8668        |
| pdh    | Pyr (123) → Aca <sub>m</sub> (23)                                                                         | 0.3685   | 0.0436  |               |
| citdh  | Aca <sub>m</sub> (12) + Oaa <sub>m</sub> (3456) → Akg <sub>m</sub> (65421) + CO <sub>2</sub> (3)          | 0.3685   | 0.0436  |               |
| akgdh  | Akg <sub>m</sub> (12345) → Suc <sub>m</sub> (2345) + CO <sub>2</sub> (1)                                  | 0.3389   | 0.0427  |               |
| sdhf   | Suc <sub>m</sub> (1234) → Mal <sub>m</sub> (1234)                                                         | 0.3389   | 0.0427  | 0.9859        |
| sdhs   | Suc <sub>m</sub> (1234) → Mal <sub>m</sub> (4321)                                                         | 0.6570   | 0.3330  |               |
| mdhf   | Mal <sub>m</sub> (1234) → Oaa <sub>m</sub> (1234)                                                         | 0.6244   | 0.2189  | 0.9337        |
| mef    | Mal <sub>m</sub> (1234) → Pyr (123) + CO <sub>2</sub> (4)                                                 | -0.2856  | 0.1947  | 0.2663        |
| pyrc   | Pyr (123) + CO <sub>2</sub> (4) → Oaa <sub>m</sub> (1234)                                                 | 0.1722   | 0.2276  |               |
| pepck  | Oaa <sub>m</sub> (1234) → PEP (123) + CO <sub>2</sub> (4)                                                 | 0.4012   | 0.1340  | 0.1748        |
| mgdhf  | Akg <sub>m</sub> (12345) → Glu <sub>c</sub> (12345)                                                       | 0.0296   | 0.0023  |               |
| Serf   | T3P <sub>p</sub> (123) → Ser (123)                                                                        | 0.0104   | 0.0007  |               |
| Glyf   | Ser (123) → Gly (12) + CHO (3)                                                                            | 0.0074   | 0.0005  | 0.6071        |
| Alaf   | Pyr (123) → Ala (123)                                                                                     | 0.0124   | 0.0008  |               |
| Aspf   | Oaa <sub>m</sub> (1234) → Asp (1234)                                                                      | 0.0148   | 0.0004  |               |
| Hisf   | P5P <sub>p</sub> (12345) + CHO (6) → His (123456)                                                         | 0.0011   | 0.0003  |               |
| Ilef   | Thr (1234) + Pyr <sub>p</sub> (567) → Ile (123467) + CO <sub>2</sub> (5)                                  | 0.0064   | 0.0001  |               |
| Metf   | Oaa <sub>m</sub> (1234) + CHO (5) → Met (12345)                                                           | 0.0009   | 0.0001  |               |
| Thrf   | Asp (1234) → Thr (1234)                                                                                   | 0.0091   | 0.0001  |               |
| Valf   | Pyr <sub>p</sub> (123) + Pyr <sub>p</sub> (456) → Val (12356) + CO <sub>2</sub> (4)                       | 0.0239   | 0.0002  |               |
| Leu3f  | Aca <sub>p</sub> (12) + Val (34567) → Leu (124567) + CO <sub>2</sub> (3)                                  | 0.0181   | 0.0001  |               |
| sero   | Ser →                                                                                                     | 0.0040   | 0.0001  |               |

# Supplementary Tables

**Table S6. Metabolic network model incorporating isotopomer correction for different amino acids (Iso\_corr[V]).**

|         | Reaction           | Net flux | Flux SD | Reversibility |
|---------|--------------------|----------|---------|---------------|
| Glyo    | Gly →              | 0.0075   | 0.0005  |               |
| E4Po    | E4P →              | 0.0073   | 0.0025  |               |
| pyro    | Pyr →              | 0.0027   | 0.0002  |               |
| pyrpo   | Pyr <sub>p</sub> → | 0.0026   | 0.0001  |               |
| OAAmo   | Oaa <sub>m</sub> → | 0.0112   | 0.0011  |               |
| CHOO    | CHO →              | 0.0054   | 0.0005  |               |
| Alao    | Ala →              | 0.0127   | 0.0008  |               |
| Aspo    | Asp →              | 0.0068   | 0.0004  |               |
| gluo    | Glu →              | 0.0308   | 0.0024  |               |
| hiso    | His →              | 0.0012   | 0.0003  |               |
| Ileo    | Ile →              | 0.0074   | 0.0000  |               |
| Meto    | Met →              | 0.0010   | 0.0001  |               |
| Thro    | Thr →              | 0.0027   | 0.0000  |               |
| Valo    | Val →              | 0.0080   | 0.0001  |               |
| Leuo    | Leu →              | 0.0206   | 0.0001  |               |
| suco    | Suc →              | 0.0266   | 0.0013  |               |
| starcho | G6P <sub>p</sub> → | 0.0203   | 0.0022  |               |
| lipid   | Aca <sub>p</sub> → | 0.2086   | 0.0031  |               |

# Supplementary Tables

**Table S7. Metabolic network model incorporating amino acid reflux (AA\_in).**

|         | Reaction                                                                                                  | Net flux | Flux SD | Reversibility |
|---------|-----------------------------------------------------------------------------------------------------------|----------|---------|---------------|
| glci    | → Glc                                                                                                     | 0.5698   | 0.0105  |               |
| CO2in   | → CO <sub>2b</sub>                                                                                        | 0.1862   | 0.1570  |               |
| CO2out  | CO <sub>2</sub> →                                                                                         | 2.4669   | 0.1774  |               |
| CO2exf  | CO <sub>2</sub> → CO <sub>b</sub>                                                                         | -0.1429  | 0.1573  | 0.7763        |
| Alai    | → Ala                                                                                                     | 0.0018   | 0.0017  |               |
| Aspi    | → Asp                                                                                                     | 0.0016   | 0.0004  |               |
| Glui    | → Glu                                                                                                     | 0.0011   | 0.0012  |               |
| Glyi    | → Gly                                                                                                     | 0.0003   | 0.0003  |               |
| Hisi    | → His                                                                                                     | 0.0001   | 0.0000  |               |
| Ilei    | → Ile                                                                                                     | 0.0008   | 0.0001  |               |
| Meti    | → Met                                                                                                     | 0.0001   | 0.0001  |               |
| Seri    | → Ser                                                                                                     | 0.0007   | 0.0003  |               |
| Thri    | → Thr                                                                                                     | 0.0003   | 0.0001  |               |
| Vali    | → Val                                                                                                     | 0.0016   | 0.0004  |               |
| leui    | → Leu                                                                                                     | 0.0019   | 0.0001  |               |
| Pyrpi   | → Pyr <sub>p</sub>                                                                                        | 0.0008   | 0.0002  |               |
| Oaami   | → Oaa <sub>m</sub>                                                                                        | 0.0025   | 0.0015  |               |
| Pyri    | → Pyr                                                                                                     | 0.0009   | 0.0004  |               |
| Suci    | → Suc <sub>m</sub>                                                                                        | 0.0078   | 0.0013  |               |
| Starchi | → G6P <sub>p</sub>                                                                                        | 0.0044   | 0.0006  |               |
| T3Ppi   | → T3P <sub>p</sub>                                                                                        | 0.0024   | 0.0012  |               |
| E4Ppi   | → E4P <sub>p</sub>                                                                                        | 0.0014   | 0.0008  |               |
| Acapi   | → Aca <sub>p</sub>                                                                                        | 0.0094   | 0.0011  |               |
| Acain   | → Aca <sub>1</sub>                                                                                        | 0.0083   | 0.0031  |               |
| Acatf   | Aca <sub>1</sub> (123) → Aca <sub>m</sub> (123)                                                           | 0.0083   | 0.0031  |               |
| pgif    | G6P (123456) → F6P (123456)                                                                               | 0.3577   | 0.1008  | 0.3712        |
| g6pdh   | G6P (123456) → P5P (23456)                                                                                | 0.1651   | 0.0709  |               |
| tktAf   | P5P (12345) + P5P (67890) → S7P (1267890) + T3P (345)                                                     | -0.0130  | 0.0647  | 0.3276        |
| talF    | S7P (1234567) + T3P (890) → F6P (123890) + E4P (4567)                                                     | -0.0130  | 0.0647  | 0.7689        |
| tktBf   | P5P (12345) + E4P (6789) → F6P (126789) + T3P (345)                                                       | -0.0184  | 0.0647  | 0.7768        |
| pfk     | F6P (123456) → T3P (321) + T3P (456)                                                                      | 0.3071   | 0.0659  | 0.5756        |
| pyrf    | PEP (123) → Pyr (123)                                                                                     | 0.8414   | 0.2060  |               |
| g6pt    | G6P (123456) → G6P <sub>p</sub> (123456)                                                                  | 0.0470   | 0.0591  | 0.2965        |
| pgifp   | G6P <sub>p</sub> (123456) → F6P <sub>p</sub> (123456)                                                     | -0.4002  | 0.2359  | 0.8545        |
| g6pdhp  | G6P <sub>p</sub> (123456) → P5P <sub>p</sub> (23456) + CO <sub>2</sub> (1)                                | 0.4301   | 0.2293  |               |
| tktAfp  | P5P <sub>p</sub> (12345) + P5P <sub>p</sub> (67890) → S7P <sub>p</sub> (1267890) + T3P <sub>p</sub> (345) | 0.2128   | 0.1120  | 0.9950        |
| talfp   | S7P <sub>p</sub> (1234567) + T3P <sub>p</sub> (890) → F6P <sub>p</sub> (123890) + E4P <sub>p</sub> (4567) | 0.2128   | 0.1120  | 0.9847        |
| tktBfp  | P5P <sub>p</sub> (12345) + E4P <sub>p</sub> (6789) → F6P <sub>p</sub> (126789) + T3P <sub>p</sub> (345)   | 0.2128   | 0.1120  | 0.8536        |
| pfkp    | F6P <sub>p</sub> (123456) → T3P <sub>p</sub> (321) + T3P <sub>p</sub> (456)                               | 0.0254   | 0.0554  | 0.3931        |
| pepfp   | T3P <sub>p</sub> (123) → Pyr <sub>p</sub> (123)                                                           | 0.1374   | 0.1409  |               |
| pdhp    | Pyr <sub>p</sub> (123) → Aca <sub>p</sub> (23)                                                            | 0.2164   | 0.0033  |               |
| t3pt    | T3P <sub>p</sub> (123) → T3P (123)                                                                        | 0.1159   | 0.1636  | 0.0944        |
| P5Ptf   | P5P (12345) → P5P <sub>p</sub> (12345)                                                                    | 0.2096   | 0.1437  | 0.0481        |
| pyrtfp  | Pyr (123) → Pyr <sub>p</sub> (123)                                                                        | 0.1601   | 0.1471  | 0.7409        |
| pdh     | Pyr (123) → Aca <sub>m</sub> (23)                                                                         | 0.4844   | 0.0616  |               |
| citdh   | Aca <sub>m</sub> (12) + Oaa <sub>m</sub> (3456) → Akg <sub>m</sub> (65421) + CO <sub>2</sub> (3)          | 0.4927   | 0.0627  |               |
| akgdh   | Akg <sub>m</sub> (12345) → Suc <sub>m</sub> (2345) + CO <sub>2</sub> (1)                                  | 0.4623   | 0.0626  |               |
| sdhf    | Suc <sub>m</sub> (1234) → Mal <sub>m</sub> (1234)                                                         | 0.4735   | 0.0586  | 0.9596        |
| sdhs    | Suc <sub>m</sub> (1234) → Mal <sub>m</sub> (4321)                                                         | 0.3905   | 0.3322  |               |
| mdhf    | Mal <sub>m</sub> (1234) → Oaa <sub>m</sub> (1234)                                                         | 0.4902   | 0.1463  | 0.9339        |
| mef     | Mal <sub>m</sub> (1234) → Pyr (123) + CO <sub>2</sub> (4)                                                 | -0.0167  | 0.1329  | 0.3278        |
| pyrc    | Pyr (123) + CO <sub>2</sub> (4) → Oaa <sub>m</sub> (1234)                                                 | 0.1676   | 0.1103  |               |
| pepck   | Oaa <sub>m</sub> (1234) → PEP (123) + CO <sub>2</sub> (4)                                                 | 0.1410   | 0.0875  | 0.1850        |
| mgdhf   | Akg <sub>m</sub> (12345) → Glu <sub>c</sub> (12345)                                                       | 0.0303   | 0.0026  | 0.7068        |

# Supplementary Tables

**Table S7. Metabolic network model incorporating amino acid reflux (AA\_in).**

|         | Reaction                                                                            | Net flux | Flux SD | Reversibility |
|---------|-------------------------------------------------------------------------------------|----------|---------|---------------|
| Serf    | T3P <sub>p</sub> (123) → Ser (123)                                                  | 0.0104   | 0.0007  | 0.5454        |
| Glyf    | Ser (123) → Gly (12) + CHO (3)                                                      | 0.0072   | 0.0006  | 0.7329        |
| Alaf    | Pyr (123) → Ala (123)                                                               | 0.0109   | 0.0017  | 0.8792        |
| Aspf    | Oaa <sub>m</sub> (1234) → Asp (1234)                                                | 0.0144   | 0.0005  | 0.3232        |
| Hisf    | P5P <sub>p</sub> (12345) + CHO (6) → His (123456)                                   | 0.0012   | 0.0003  |               |
| Ilef    | Thr (1234) + Pyr <sub>p</sub> (567) → Ile (123467) + CO <sub>2</sub> (5)            | 0.0066   | 0.0001  |               |
| Metf    | Oaa <sub>m</sub> (1234) + CHO (5) → Met (12345)                                     | 0.0009   | 0.0001  |               |
| Thrf    | Asp (1234) → Thr (1234)                                                             | 0.0090   | 0.0001  |               |
| Valf    | Pyr <sub>p</sub> (123) + Pyr <sub>p</sub> (456) → Val (12356) + CO <sub>2</sub> (4) | 0.0363   | 0.0090  |               |
| Valcat  | Val (12345) → Suc <sub>m</sub> (2345) + CO <sub>2</sub> (1)                         | 0.0112   | 0.0094  |               |
| Leu3f   | Aca <sub>p</sub> (12) + Val (34567) → Leu (124567) + CO <sub>2</sub> (3)            | 0.0187   | 0.0002  |               |
| sero    | Ser →                                                                               | 0.0039   | 0.0001  |               |
| Glyo    | Gly →                                                                               | 0.0075   | 0.0004  |               |
| E4Po    | E4P →                                                                               | 0.0067   | 0.0021  |               |
| pyro    | Pyr →                                                                               | 0.0026   | 0.0002  |               |
| pyrpo   | Pyr <sub>p</sub> →                                                                  | 0.0026   | 0.0001  |               |
| OAAmo   | Oaa <sub>m</sub> →                                                                  | 0.0113   | 0.0009  |               |
| CHOo    | CHO →                                                                               | 0.0050   | 0.0007  |               |
| Alao    | Ala →                                                                               | 0.0127   | 0.0006  |               |
| Aspo    | Asp →                                                                               | 0.0070   | 0.0003  |               |
| gluo    | Glu →                                                                               | 0.0314   | 0.0022  |               |
| hiso    | His →                                                                               | 0.0013   | 0.0003  |               |
| Ileo    | Ile →                                                                               | 0.0075   | 0.0001  |               |
| Meto    | Met →                                                                               | 0.0010   | 0.0001  |               |
| Thro    | Thr →                                                                               | 0.0026   | 0.0001  |               |
| Valo    | Val →                                                                               | 0.0080   | 0.0001  |               |
| Leuo    | Leu →                                                                               | 0.0206   | 0.0001  |               |
| suco    | Suc →                                                                               | 0.0270   | 0.0014  |               |
| starcho | G6P <sub>p</sub> →                                                                  | 0.0215   | 0.0019  |               |
| lipid   | Aca <sub>p</sub> →                                                                  | 0.2071   | 0.0030  |               |
