# Supplementary figures and images for: Flux and reflux: metabolite reflux in plant suspension cells and its implications for isotope-assisted metabolic flux analysis
Source: Royal Society of Chemistry journal article supplement (doi:10.1039/c3mb70348g), 2013-12-23

## Without reflux

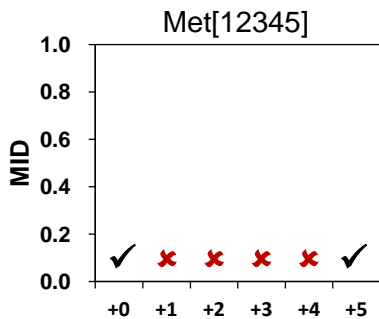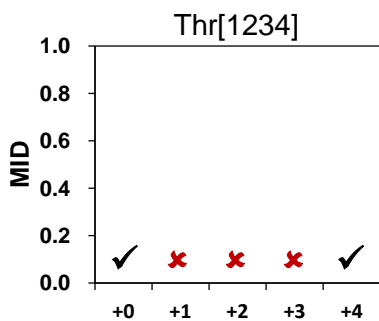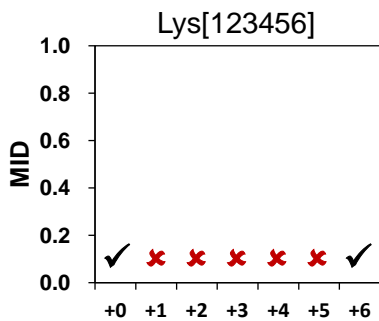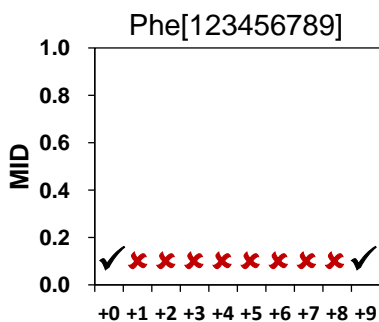

Postulated MIDs

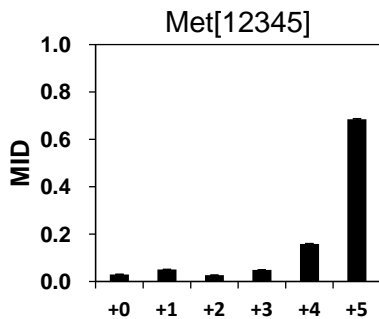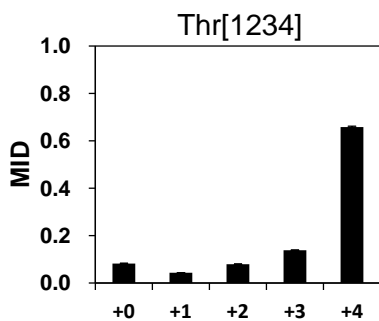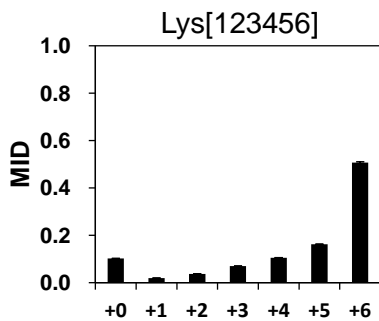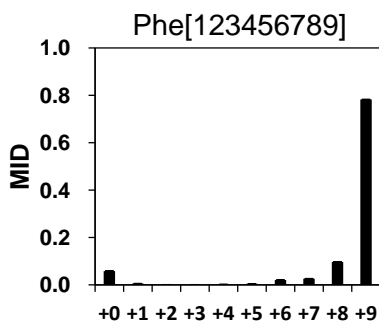

Measured MIDs

## With reflux

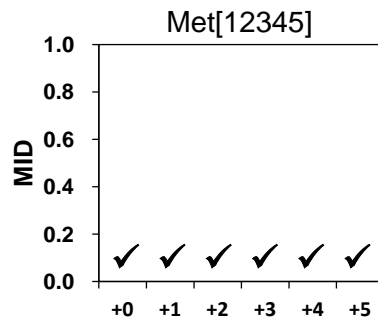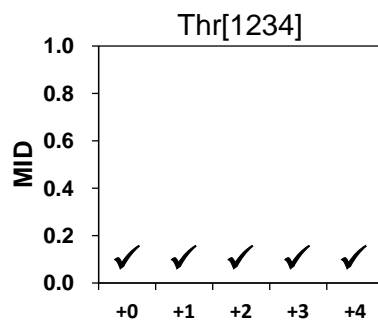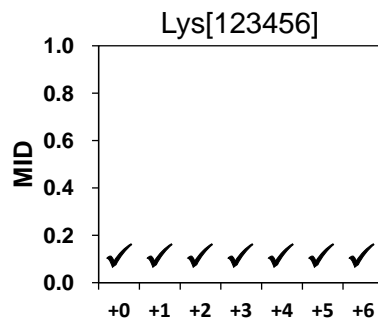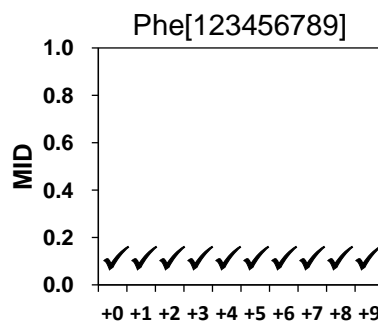

Postulated MIDs

Supplement: c3mb70348g.pdf [file c3mb70348g.pdf]
